# Supplementary material for: Comparison of Antiviral Agents for Seasonal Influenza Outcomes in Healthy Adults and Children: A Systematic Review and Network Meta-analysis
Source: PubMed Central journal article supplement (PMC8363918; doi:10.1001/jamanetworkopen.2021.19151), 2021-08-13
Supplement: jamanetwopen-e2119151-s001.pdf [file jamanetwopen-e2119151-s001.pdf]

## Supplemental Online Content

Liu JW, Lin SH, Wang LC, Chiu HY, Lee JA. Comparison of antiviral agents for seasonal influenza outcomes in healthy adults and children: a systematic review and network meta-analysis. *JAMA Netw Open*. 2021;4(8):e2119151. doi:10.1001/jamanetworkopen.2021.19151

**eAppendix 1.** Search Strategy

**eTable 1.** Characteristics of Included Studies

**eFigure 1.** Risk of Bias of Included Studies

**eFigure 2.** Network Graphs of Safety Outcomes

**eFigure 3.** League Tables

**eTable 2.** Global Inconsistency of All Outcomes

**eAppendix 2.** Netsplit Analysis of Inconsistency

**eTable 3.** Sensitivity Analysis

**eTable 4.** Mantel-Haenszel (MH) Method for Binary Outcomes

**eFigure 4.** Comparison-Adjusted Funnel Plot

**eTable 5.** Certainty of Direct Evidence Assessment

**eTable 6.** Certainty of Network Evidence Assessment

This supplemental material has been provided by the authors to give readers additional information about their work.

## eAppendix 1. Search Strategy

### Keywords for randomized-controlled trials

#### MEDLINE (via PubMed)

1 ("seasonal influenza" OR Influenza, Human [mesh])

2 (oseltamivir OR zanamivir OR tamiflu OR relenza OR peramivir OR rapiacta OR rapivab OR favipiravir OR Avigan OR Pimodivir OR JNJ-63623872 OR VX-787 OR "Baloxavir marboxil" OR "Baloxavir OR S-033188")

3 (randomized controlled trial [pt] OR controlled clinical trial [pt] OR randomized [tiab] OR placebo [tiab] OR drug therapy [sh] OR randomly [tiab] OR trial [tiab] OR groups [tiab])

4 animals [mh] NOT humans [mh]

5 #3 NOT #4

6 #1 AND #2 AND #5

= ("seasonal influenza" OR Influenza, Human [mesh]) AND (oseltamivir OR zanamivir OR tamiflu OR relenza OR peramivir OR rapiacta OR rapivab OR favipiravir OR Avigan OR pimodivir OR JNJ-63623872 OR VX-787 OR "baloxavir marboxil" OR "baloxavir OR S-033188") AND

(randomized controlled trial [pt] OR controlled clinical trial [pt] OR randomized [tiab] OR placebo [tiab] OR drug therapy [sh] OR randomly [tiab] OR trial [tiab] OR groups [tiab]) NOT (animals [mh] NOT humans [mh])

#### EMBASE (via Embase.com)

1 'influenza'/exp

2 'influenza virus a'/exp OR 'influenza virus b'/de

3 influenza\*:ab,ti OR flu:ab,ti

4 #1 OR #2 OR #3

5 'neuraminidase inhibitor':ab,ti OR 'neuraminidase inhibitors':ab,ti

6 'oseltamivir'/de OR 'zanamivir'/de OR 'tamiflu'/de OR 'relenza'/de OR 'peramivir'/de OR 'rapiacta'/de OR 'rapivab'/de OR 'favipiravir'/de OR 'Avigan'/de OR 'Pimodivir'/de OR 'JNJ-63623872'/de OR 'VX-787'/de OR 'Baloxavir marboxil'/de OR 'Baloxavir OR S-033188'/de

7 #5 OR #6

8 #4 AND #7

9 Limit to randomized-controlled trials

('influenza'/exp OR 'influenza virus a'/exp OR 'influenza virus b'/de OR influenza\*:ab,ti OR flu:ab,ti) AND ('neuraminidase inhibitor':ab,ti OR 'neuraminidase inhibitors':ab,ti OR 'oseltamivir'/de OR 'zanamivir'/de OR 'tamiflu'/de OR 'relenza'/de OR 'peramivir'/de OR 'rapiacta'/de OR 'rapivab'/de OR 'favipiravir'/de OR 'Avigan'/de OR 'Pimodivir'/de OR 'JNJ-63623872'/de OR 'VX-787'/de OR 'Baloxavir marboxil'/de OR 'Baloxavir OR S-033188'/de) AND ([randomized controlled trial]/lim)

#### CENTRAL (via Cochrane Library)

(seasonal influenza OR [mh "influenza, human"]) AND (oseltamivir OR zanamivir OR tamiflu OR relenza OR peramivir OR rapiacta OR rapivab OR favipiravir OR Avigan OR Pimodivir OR JNJ-63623872 OR VX-787 OR "Baloxavir marboxil" OR Baloxavir OR S-033188)

## Keywords for systematic review/meta-analysis

### MEDLINE (via PubMed)

1 ("seasonal influenza" OR Influenza, Human [mesh])

2 (oseltamivir OR zanamivir OR tamiflu OR relenza OR peramivir OR rapiacta OR rapivab OR favipiravir OR Avigan OR Pimodivir OR JNJ-63623872 OR VX-787 OR "Baloxavir marboxil" OR Baloxavir OR S-033188)

3 systematic [sb]

4 #1 AND #2 AND #3

### EMBASE (via Embase.com)

1 'influenza'/exp

2 'influenza virus a'/exp OR 'influenza virus b'/de

3 influenza\*:ab,ti OR flu:ab,ti

4 #1 OR #2 OR #3

5 'neuraminidase inhibitor':ab,ti OR 'neuraminidase inhibitors':ab,ti

6 'oseltamivir'/de OR 'zanamivir'/de OR 'tamiflu'/de OR 'relenza'/de OR 'peramivir'/de OR 'rapiacta'/de OR 'rapivab'/de OR

'favipiravir'/de OR 'Avigan'/de OR 'Pimodivir'/de OR 'JNJ-63623872'/de OR 'VX-787'/de OR 'Baloxavir marboxil'/de OR 'Baloxavir OR S-033188'/de

7 #5 OR #6

8 #4 AND #7

9 Limit to systematic review

### CENTRAL (via Cochrane Library)

(seasonal influenza OR [mh "influenza, human"]) AND (oseltamivir OR zanamivir OR tamiflu OR relenza OR peramivir OR rapiacta OR rapivab OR favipiravir OR Avigan OR Pimodivir OR JNJ-63623872 OR VX-787 OR "Baloxavir marboxil" OR Baloxavir OR S-033188)

limit to Cochrane review

**eTable 1.** Characteristics of Included Studies

| Studies included in <b>qualitative and quantitative</b> synthesis (network meta-analysis) (n=26) |                              |                              |                        |                                                |                      |                      |          |          |                                                                                                                                                                      |
|--------------------------------------------------------------------------------------------------|------------------------------|------------------------------|------------------------|------------------------------------------------|----------------------|----------------------|----------|----------|----------------------------------------------------------------------------------------------------------------------------------------------------------------------|
| Trial, published year                                                                            | Country                      | Population                   | Group (age)            | Intervention                                   | Drugs                |                      | Control  |          | Outcomes                                                                                                                                                             |
|                                                                                                  |                              |                              |                        |                                                | ITT (No. randomized) | ITTI (No. confirmed) | ITT      | ITTI     |                                                                                                                                                                      |
| Deng,2004                                                                                        | China (published in Chinese) | ILI ( $\leq$ 48h)            | 16-48                  | OSE 75 mg BID<br>PLA                           | 599                  | NA                   | 577      | NA       | TTAS ( <b>only ITT data reported</b> )<br>Complications: sinusitis, tracheobronchitis, tonsillitis, bronchial asthma, otitis media, etc.<br>AEs: GI, dizziness, etc. |
| Fan,2019                                                                                         | China (published in Chinese) | ILI ( $\leq$ 48h)<br>RAT(+)  | 15-70                  | PER 600 mg single dose<br>OSE 75 mg BID<br>PLA | PER: 50<br>OSE: 57   | PER: 47<br>OSE: 53   | 26       | 26       | TTAS ( <b>without ITTI HR or KM-curve</b> )<br>Complications: Otitis media, sinusitis, pneumonia, etc.<br>AEs: no detail definition mentioned.                       |
| Fry,2014                                                                                         | Bangladesh                   | ILI ( $\leq$ 120h)<br>RAT(+) | All ( $\geq$ 1)        | OSE 75 mg BID<br>PLA                           | 598                  | 587                  | 592      | 576      | TTAS ( <b>only ITT data reported</b> )<br>Complication: Not reported.<br>AEs: GI \ severe AE (requiring hospital admission)                                          |
| Hayden,1997                                                                                      | North America, Europe        | ILI ( $\leq$ 48h)            | Adults ( $\geq$ 18)    | ZAN 10 mg BID<br>PLA                           | 132                  | 85                   | 144      | 89       | TTAS (ITTI)<br>Complication (antibiotics-prescribed) otitis media, sinusitis, etc.<br>AEs: GI, upper respiratory tract, etc.                                         |
| Hayden,2018                                                                                      | Japan                        | ILI ( $\leq$ 48h)            | 12-64                  | BAL 40/80 single dose<br>OSE 75 mg BID<br>PLA  | BAL: 612<br>OSE: 514 | BAL: 456<br>OSE: 377 | PLA: 310 | PLA: 231 | TTAS (ITTI)<br>Complications (antibiotic use)<br>AEs: GI, nasopharyngitis, liver function, headache, dizziness, leukopenia, etc.                                     |
| Hayden,2000                                                                                      | US, Canada, UK, Finland      | ILI ( $\leq$ 36h)            | $\geq$ 5               | ZAN 10 mg BID<br>PLA                           | 163                  | 76                   | 158      | 81       | TTAS ( <b>without ITTI HR or KM-curve</b> )<br>Complications: Not reported.<br>AEs: no detail definition mentioned (but including pneumonia).                        |
| Hedrick, 2000                                                                                    | US, Canada, Europe, Israel   | ILI ( $\leq$ 36h)            | <b>Children (5-12)</b> | ZAN 10 mg BID<br>PLA                           | 224                  | 164                  | 247      | 182      | TTAS (ITTI)<br>Complications: no detail definition mentioned.<br>AEs: GI, respiratory disorder, laboratory abnormalities.                                            |

|                |                                                                           |                              |                       |                                                         |                              |                            |             |     |                                                                                                                                                                                                   |
|----------------|---------------------------------------------------------------------------|------------------------------|-----------------------|---------------------------------------------------------|------------------------------|----------------------------|-------------|-----|---------------------------------------------------------------------------------------------------------------------------------------------------------------------------------------------------|
| Heinonen,2010  | Finland                                                                   | ILI ( $\leq 24$ h)           | <b>Children (1-3)</b> | OSE 75 mg BID<br>PLA                                    | 203                          | 37                         | 205         | 61  | TTAS (ITTI)<br>Complications: only acute otitis media, pneumonia reported.<br>AEs: GI, bronchiolitis, exanthema, irritability, fatigue, headache, or decreased appetite, etc.                     |
| Ison,2020      | Japan, South Korea, Taiwan, US, Europe, NZ, South Africa (17 countries)   | ILI ( $\leq 48$ h)           | $\geq 12$             | BAL single dose<br>OSE 75 mg BID<br>PLA                 | BAL: 730<br>OSE: 725         | BAL: 385<br>OSE:388        | 729         | 385 | TTAS<br>Complications: sinusitis, otitis media, bronchitis, pneumonia.<br>AEs: bronchitis, sinusitis, diarrhea, nausea, etc.                                                                      |
| Jong,2014      | US, Canada, South America, Europe, India, NZ, South Africa (21 countries) | <b>Hospitalized RAT(+)</b>   | $\geq 6$              | PER 600 mg QD (5 days)<br>PLA                           | NA                           | 78                         | NA          | 43  | TTAS ( <b>without ITTI HR or KM-curve</b> )<br>Complications: otitis, sinusitis, bronchitis, <b>pneumonia</b> .<br>AEs: GI, serious AEs (COPD, <b>pneumonia</b> )                                 |
| Kashiwagi,2000 | Japan (published in Japanese)                                             | ILI ( $\leq 36$ h)           | $\geq 16$             | OSE 75 mg BID<br>PLA                                    | 154                          | 121                        | 162         | 130 | TTAS (ITTI)<br>Complications: NA<br>AEs: GI, infection ( <b>pneumonia</b> ), musculoskeletal disorders, respiratory disorders, skin and subcutaneous disorders, metabolism disorders, etc.        |
| Kohno,2010     | Japan                                                                     | ILI ( $\leq 48$ h)           | Adults (20-64)        | PER 300 mg single dose<br>PER 600 mg single dose<br>PLA | PER 300: 100<br>PER 600: 100 | PER 300: 99<br>PER 600: 97 | 100         | 100 | TTAS (ITTI)<br>Complications: otitis media, bronchitis, sinusitis, pneumonia.<br>AEs: GI, nasopharyngitis, liver function disorders, hematology disorders, metabolism disorders, etc.             |
| Kohno,2011     | Japan                                                                     | ILI ( $\leq 48$ h)<br>RAT(+) | Adults ( $\geq 20$ )  | PER 300 mg QD<br>PER 600 mg QD (1-5 days as needed)     | PER 300: 21                  | NA                         | PER 600: 21 | NA  | TTAS ( <b>only per-protocol data</b> )<br>Complications: <b>pneumonia</b> , bronchitis, otitis media, sinusitis.<br>AEs: GI, <b>pneumonia</b> , oral herpes infection, hematology disorders, etc. |

|                |                                      |                              |                                                     |                                         |                             |                             |          |          |                                                                                                                                                                                                                                                   |
|----------------|--------------------------------------|------------------------------|-----------------------------------------------------|-----------------------------------------|-----------------------------|-----------------------------|----------|----------|---------------------------------------------------------------------------------------------------------------------------------------------------------------------------------------------------------------------------------------------------|
| Li,2004        | China                                | LI ( $\leq 36h$ )            | Adults (18-65)                                      | OSE 75 mg BID<br>PLA                    | 216                         | 134                         | 235      | 139      | TTAS (ITTI)<br>Complications: bronchitis, pneumonia, sinusitis, tonsillitis, otitis media, etc.<br>AEs: GI, neurological symptoms, rashes, etc.                                                                                                   |
| Lin,2006       | China                                | ILI ( $\leq 48h$ )           | Adults (OSE: 48.1 $\pm$ 0.8<br>S: 52.3 $\pm$ 16.0 ) | OSE 75 mg BID<br>Symptomatic treatment  | 58                          | 27                          | 60       | 29       | TTAS (ITTI)<br>Complications: tracheitis, bronchitis, pneumonia, nasosinusitis, pharyngitis.<br>AEs: GI.                                                                                                                                          |
| Mäkelä,2000    | Europe                               | ILI ( $\leq 48h$ )           | $\geq 12$                                           | ZAN 10 mg BID<br>PLA                    | 174                         | 136                         | 182      | 141      | TTAS (ITTI)<br>Complications: generally pulmonary, infections.<br>AEs: GI, bronchitis, sinusitis, <b>pneumonia</b> , etc.                                                                                                                         |
| MIST,1998      | Australia, New Zealand, South Africa | ILI ( $\leq 36h$ )           | $\geq 12$                                           | ZAN 10 mg BID<br>PLA                    | 227                         | 161                         | 228      | 160      | TTAS ( <b>without ITTI HR or KM-curve</b> )<br>Complications: bronchitis, pneumonia, chest infections, etc.<br>AEs: GI, bronchitis, cough, sinusitis, LRTI, etc.                                                                                  |
| Monto,1999     | Not reported                         | ILI ( $\leq 48h$ )           | All                                                 | ZAN 10 mg BID<br>PLA                    | 1133                        | 807                         | 1102     | 765      | TTAS ( <b>without ITTI HR or KM-curve</b> )<br>Complications: (antibiotic use) sinusitis, otitis media, bronchitis, etc.<br>AEs: NA                                                                                                               |
| Nakamura,2017  | Japan                                | ILI ( $\leq 48h$ )<br>RAT(+) | Adults ( $\geq 20$ )                                | PER 600 mg single dose<br>OSE 75 mg BID | PER: 46                     | as ITT                      | OSE: 46  | as ITT   | TTAS ( <b>only alleviation of fever reported</b> )<br>Complications: pneumonia, bronchitis, bronchial asthma attack, etc.<br>AEs: GI, <b>pneumonia</b> , bronchial asthma attack, COPD exacerbation, liver dysfunction, decrease WBC counts, etc. |
| Nicholson,2000 | Europe, Canada                       | ILI ( $\leq 36h$ )           | Adults (18-65)                                      | OSE 75 mg BID<br>OSE 150 mg BID<br>PLA  | OSE 75: 241<br>OSE 150: 243 | OSE 75: 158<br>OSE 150: 156 | PLA: 235 | PLA: 161 | TTAS (ITTI)<br>Complications (antibiotic treatment): otitis media, bronchitis, sinusitis, pneumonia.<br>AEs: GI.                                                                                                                                  |
| Puhakka,2003   | Finland                              | ILI ( $\leq 48h$ )           | All                                                 | ZAN 10 mg BID<br>PLA                    | 293                         | 222                         | 295      | 213      | TTAS ( <b>without ITTI HR or KM-curve</b> )<br>Complications: no detail definition mentioned.<br>AEs: GI, sinusitis, tonsillitis, pneumonia,                                                                                                      |

|                                                                     |                                             |                                     |                       |                                                     |                                                   |                             |             |             |                                                                                                                                                                                                    |
|---------------------------------------------------------------------|---------------------------------------------|-------------------------------------|-----------------------|-----------------------------------------------------|---------------------------------------------------|-----------------------------|-------------|-------------|----------------------------------------------------------------------------------------------------------------------------------------------------------------------------------------------------|
|                                                                     |                                             |                                     |                       |                                                     |                                                   |                             |             |             | hemorrhage, musculoskeletal pain, fever, cough, etc.                                                                                                                                               |
| SEAICRN,2013                                                        | Indonesia, Singapore, Thailand, Vietnam     | <b>Hospitalized</b><br>RAT (+)      | All (≥1)              | OSE 75 mg BID<br>OSE 150 mg BID                     | OSE 150: 165                                      | OSE 150: 159                | OSE 75: 161 | OSE 75: 154 | TTAS, Complication: Not reported.<br>AEs: GI, respiratory failure, multi-organ failure, bronchitis, pneumothorax, neutropenia, thrombocytosis, pyrexia, sepsis, rash, etc.                         |
| Treanor,2000                                                        | US                                          | ILI (≤ 36h)                         | Adults (18-65)        | OSE 75 mg BID<br>OSE 150 mg BID<br>PLA              | OSE 75: 211<br>OSE 150: 209                       | OSE 75: 124<br>OSE 150: 121 | PLA: 209    | PLA: 129    | TTAS (ITTI)<br>Complications: otitis, bronchitis, sinusitis, and pneumonia<br>AEs: GI                                                                                                              |
| Watanabe,2019                                                       | Japan                                       | Influenza-confirmed<br>RAT(+) & PCR | Adults (20-65)        | BAL 10 mg<br>BAL 20 mg<br>BAL 40 mg single<br>PLA   | BAL 10: 100<br><br>BAL 20: 100<br><br>BAL 40: 100 | as ITT                      | 100         | as ITT      | TTAS (ITTI)<br>Complications: sinusitis, otitis media, bronchitis, pneumonia.<br>AEs: GI, nasopharyngitis, headache, liver function disorder, WBC decreased, etc.                                  |
| Whitley,2001                                                        | US, Canada                                  | ILI (≤ 48h)                         | <b>Children (1-2)</b> | OSE 75 mg BID<br>PLA                                | 344                                               | 217                         | 351         | 235         | TTAS (ITTI)<br>Complications: otitis media, sinusitis, bronchitis or pneumonia.<br>AEs: GI, <b>pneumonia</b> , dehydration, etc.                                                                   |
| Whitley,2015                                                        | US                                          | ILI (≤ 48h)<br>RAT(+)               | Adults (≥18)          | PER 300 mg single dose<br>PLA                       | 172                                               | 163                         | 141         | 134         | TTAS (ITTI)<br>Complications: sinusitis, otitis, bronchitis, pneumonia.<br>AEs: GI, renal/urinary disorders, dizziness, infections, respiratory disorders, myalgia, metabolism disorders, insomnia |
| Studies included in <b>only qualitative</b> synthesis (without NMA) |                                             |                                     |                       |                                                     |                                                   |                             |             |             |                                                                                                                                                                                                    |
| Boivin,2000                                                         | Canada                                      | ILI                                 | ≥12                   | ZAN 10 mg BID<br>PLA                                | NA                                                | 17                          | NA          | 10          | TTAS ( <b>without ITTI HR or KM-curve</b> )<br>Complications, AEs: Not reported.                                                                                                                   |
| Ison,2013                                                           | Australia, Canada, HK, NZ, South Africa, US | <b>Hospitalized</b><br>RAT(+)       | Adults (≥18)          | OSE 75 mg BID<br><br>PER 200/400 (not our interest) | 46                                                | 41                          | PER 200/400 | PER 200/400 | TTAS, Complications: Not reported.<br>AEs: GI, hypokalemia, myocarditis, <b>pneumonia</b> , etc.                                                                                                   |

|                |                       |                              |                                       |                                                                  |                              |    |              |    |                                                                                                                                                                                      |
|----------------|-----------------------|------------------------------|---------------------------------------|------------------------------------------------------------------|------------------------------|----|--------------|----|--------------------------------------------------------------------------------------------------------------------------------------------------------------------------------------|
| Katsumi,2012   | Japan                 | ILI ( $\leq$ 48h)            | <b>Children (<math>\leq</math>15)</b> | LAN 20/40 mg single dose (not our interest)<br>ZAN 10 mg BID     | LAN: 55                      | NA | ZAN: 57      | NA | TTAS ( <b>without ITTI HR or KM-curve</b> )<br>Complications: asthmatic symptoms, pneumonia.<br>AEs: GI, abnormal behaviors.                                                         |
| Ison,2014      | US, Canada, Mexico    | <b>Hospitalized</b>          | $\geq$ 6                              | PER 600 mg QD (5 days)<br>PER 300 mg BID (5 days)                | PER 600: 117                 | 70 | PER 300: 117 | 57 | TTAS ( <b>without ITTI HR or KM-curve</b> )<br>Complications: otitis, sinusitis, bronchitis, pneumonia.<br>AEs: GI, metabolism disorders, edema, headache, agitation, insomnia, etc. |
| Matsumoto,1999 | Japan                 | ILI ( $\leq$ 36h)            | 16-65                                 | ZAN 10 mg BID<br>PLA                                             | 37                           | 22 | 39           | 29 | TTAS ( <b>without ITTI HR or KM-curve</b> )<br>Complications: NA<br>AEs: any laboratory abnormalities.                                                                               |
| Sugaya,2010    | Japan                 | ILI ( $\leq$ 36h)            | <b>Children (<math>\leq</math>9)</b>  | LAN 20/40 mg single dose<br>OSE 75 mg BID                        | LAN 40: 62<br><br>LAN 20: 62 | NA | OSE 75: 62   | NA | TTAS ( <b>with only ITT data</b> )<br>Complications: Not reported.<br>AEs: GI, gastroenteritis.                                                                                      |
| Watanabe,2010  | Europe, North America | ILI ( $\leq$ 36h)<br>RAT (+) | Adults ( $\geq$ 20)                   | LAN 20/40 mg single dose (not our interest)<br><br>OSE 75 mg BID | LAN 40: 338<br>LAN 20: 327   | NA | OSE 75: 338  | NA | TTAS: <b>NA</b> ( <b>with</b> only ITT data)<br>Complications: NA<br>AEs: GI, dizziness                                                                                              |

PLA = placebo, BAL 40/80 = baloxavir 40 or 80 mg, OSE 75 = oseltamivir 75 mg, OSE 150 = oseltamivir 150 mg, PER 300 = peramivir 300 mg, PER 600 = peramivir 600 mg, ZAN 10 = zanamivir 10 mg, LAN 20/40 = laninamivir 20 or 40 mg

ILI = influenza-like illness, RAT = rapid antigen test

ITT = intention-to-treat, ITTI = intention-to-treat-infected



# eFigure 1. Risk of Bias of Included Studies

## Risk of bias graph

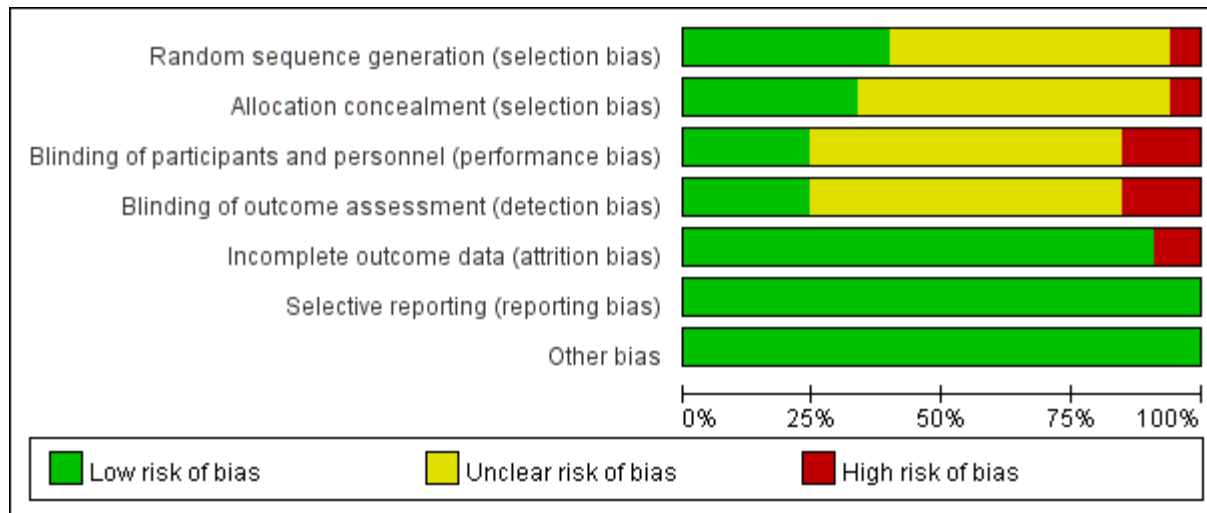

## Risk of bias summary

| Study          | Random sequence generation (selection bias) | Allocation concealment (selection bias) | Blinding of participants and personnel (performance bias) | Blinding of outcome assessment (detection bias) | Incomplete outcome data (attrition bias) | Selective reporting (reporting bias) | Other bias |
|----------------|---------------------------------------------|-----------------------------------------|-----------------------------------------------------------|-------------------------------------------------|------------------------------------------|--------------------------------------|------------|
| Bowin 2000     | ?                                           | ?                                       | ?                                                         | ?                                               | +                                        | +                                    | +          |
| Deng 2004      | ?                                           | ?                                       | ?                                                         | ?                                               | +                                        | +                                    | +          |
| Fan 2019       | ?                                           | ?                                       | ?                                                         | ?                                               | +                                        | +                                    | +          |
| Fly 2014       | ?                                           | ?                                       | ?                                                         | ?                                               | +                                        | +                                    | +          |
| Hayden 1997    | ?                                           | ?                                       | ?                                                         | ?                                               | +                                        | +                                    | +          |
| Hayden 2000    | ?                                           | ?                                       | ?                                                         | ?                                               | +                                        | +                                    | +          |
| Hayden 2018    | ?                                           | ?                                       | ?                                                         | ?                                               | +                                        | +                                    | +          |
| Hedrick 2000   | ?                                           | ?                                       | ?                                                         | ?                                               | +                                        | +                                    | +          |
| Heinonen 2010  | ?                                           | ?                                       | ?                                                         | ?                                               | +                                        | +                                    | +          |
| Ison 2013      | ?                                           | ?                                       | ?                                                         | ?                                               | +                                        | +                                    | +          |
| Ison 2014      | ?                                           | ?                                       | ?                                                         | ?                                               | +                                        | +                                    | +          |
| Ison 2020      | ?                                           | ?                                       | ?                                                         | ?                                               | +                                        | +                                    | +          |
| Jong 2014      | ?                                           | ?                                       | ?                                                         | ?                                               | +                                        | +                                    | +          |
| Kashiwagi 2000 | ?                                           | ?                                       | ?                                                         | ?                                               | +                                        | +                                    | +          |
| Katsumi 2012   | ?                                           | ?                                       | ?                                                         | ?                                               | +                                        | +                                    | +          |
| Kohno 2010     | ?                                           | ?                                       | ?                                                         | ?                                               | +                                        | +                                    | +          |
| Kohno 2011     | ?                                           | ?                                       | ?                                                         | ?                                               | +                                        | +                                    | +          |
| Lu 2004        | ?                                           | ?                                       | ?                                                         | ?                                               | +                                        | +                                    | +          |
| Lin 2006       | ?                                           | ?                                       | ?                                                         | ?                                               | +                                        | +                                    | +          |
| Makela 2000    | ?                                           | ?                                       | ?                                                         | ?                                               | +                                        | +                                    | +          |
| Matsunoto 1999 | ?                                           | ?                                       | ?                                                         | ?                                               | +                                        | +                                    | +          |
| MIST 1998      | ?                                           | ?                                       | ?                                                         | ?                                               | +                                        | +                                    | +          |
| Morito 1999    | ?                                           | ?                                       | ?                                                         | ?                                               | +                                        | +                                    | +          |
| Nakamura 2017  | ?                                           | ?                                       | ?                                                         | ?                                               | +                                        | +                                    | +          |
| Nicholson 2000 | ?                                           | ?                                       | ?                                                         | ?                                               | +                                        | +                                    | +          |
| Putakka 2003   | ?                                           | ?                                       | ?                                                         | ?                                               | +                                        | +                                    | +          |
| SEACRN 2013    | ?                                           | ?                                       | ?                                                         | ?                                               | +                                        | +                                    | +          |
| Sugaya 2010    | ?                                           | ?                                       | ?                                                         | ?                                               | +                                        | +                                    | +          |
| Treanor 2000   | ?                                           | ?                                       | ?                                                         | ?                                               | +                                        | +                                    | +          |
| Watanabe 2010  | ?                                           | ?                                       | ?                                                         | ?                                               | +                                        | +                                    | +          |
| Watanabe 2019  | ?                                           | ?                                       | ?                                                         | ?                                               | +                                        | +                                    | +          |
| Whitley 2001   | ?                                           | ?                                       | ?                                                         | ?                                               | +                                        | +                                    | +          |
| Whitley 2015   | ?                                           | ?                                       | ?                                                         | ?                                               | +                                        | +                                    | +          |

Overall, 2 trials were judged to have a low risk of bias across all domains.

2 trials were judged to have a high risk of bias for sequence generation and allocation concealment due to inadequate randomization and assignments.

5 trials were open-labeled and therefore judged to have a high risk of performance bias.

Most studies were judged to have a low risk of bias for incomplete outcome data and selective reporting; however, 3 trials were judged to have a high risk of bias for incomplete outcome data, as drop-outs and loss to follow-up could have a clinically relevant impact on the intervention effect estimates.

## eFigure 2. Network Graphs of Safety Outcomes

### A. Total adverse events

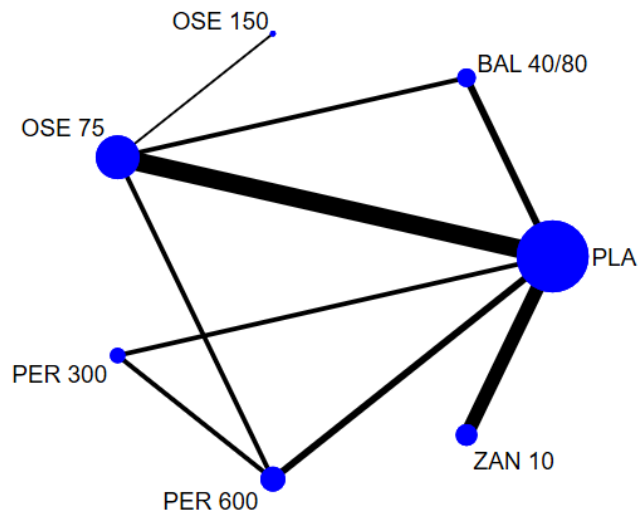

### B. Nausea

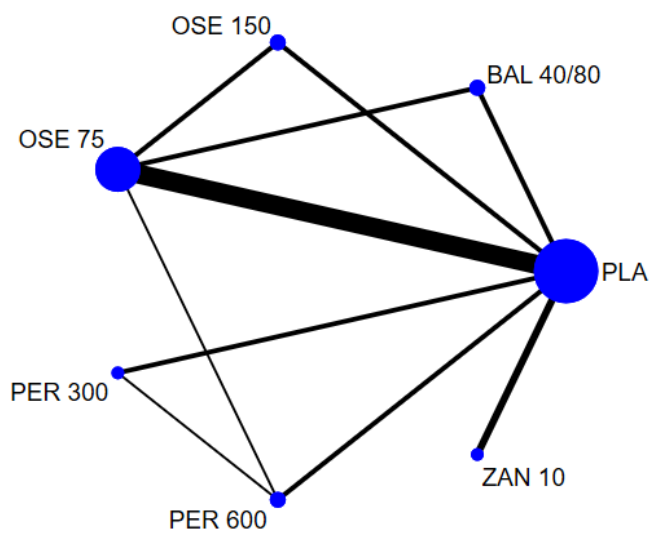

### C. Vomiting

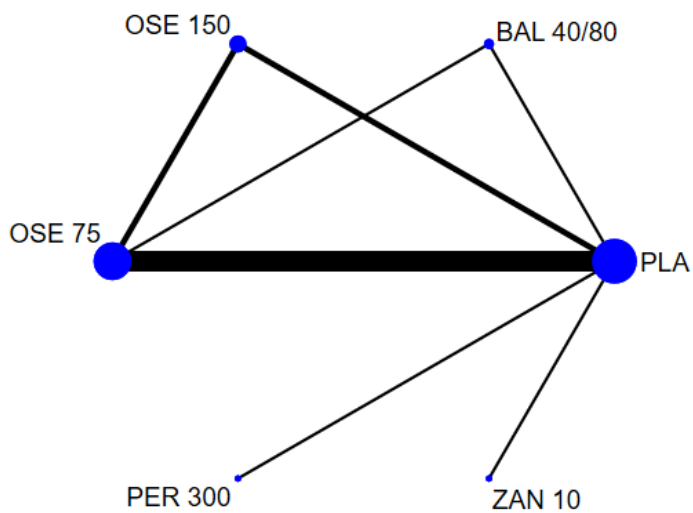

PLA=placebo, BAL 40/80=baloxavir 40 or 80 mg, OSE 75=oseltamivir 75 mg, OSE 150=oseltamivir 150 mg, PER 300=peramivir 300 mg, PER 600=peramivir 600 mg, ZAN 10=zanamivir 10 mg

### eFigure 3. League Tables

Effect sizes presented on the upper triangle are direct comparisons (head-to-head studies) between the row and columns; the effect sizes on the lower triangle are network meta-analyses between the column and the row. Comparisons are based on hazard ratio (95% confidence intervals) in TTAS and risk ratio (95% confidence intervals) in other outcomes.

#### A. TTAS

|                            |                             |                              |                               |                             |                                  |                         |
|----------------------------|-----------------------------|------------------------------|-------------------------------|-----------------------------|----------------------------------|-------------------------|
| <b>Zanamivir<br/>10 mg</b> | .                           | .                            | .                             | .                           | .                                | <b>0.67 (0.58-0.77)</b> |
| 0.97 (0.73-1.29)           | <b>Peramivir<br/>600 mg</b> | .                            | .                             | 0.99 (0.75-1.30)            | .                                | <b>0.64 (0.48-0.84)</b> |
| 0.90 (0.77-1.05)           | 0.93 (0.71-1.20)            | <b>Oseltamivir<br/>75 mg</b> | 0.98 (0.83-1.16)              | .                           | 0.96 (0.87-1.05)                 | <b>0.74 (0.69-0.79)</b> |
| 0.90 (0.73-1.09)           | 0.92 (0.69-1.23)            | 1.00 (0.86-1.15)             | <b>Oseltamivir<br/>150 mg</b> | .                           | .                                | <b>0.74 (0.63-0.86)</b> |
| 0.89 (0.70-1.13)           | 0.92 (0.71-1.18)            | 0.99 (0.81-1.21)             | 0.99 (0.78-1.26)              | <b>Peramivir<br/>300 mg</b> | .                                | <b>0.75 (0.62-0.91)</b> |
| <b>0.84 (0.71-0.99)</b>    | 0.87 (0.67-1.13)            | 0.94 (0.86-1.02)             | 0.94 (0.80-1.10)              | 0.95 (0.77-1.17)            | <b>Baloxavir<br/>40 or 80 mg</b> | <b>0.81 (0.74-0.89)</b> |
| <b>0.67 (0.58-0.77)</b>    | <b>0.69 (0.54-0.88)</b>     | <b>0.74 (0.70-0.79)</b>      | <b>0.75 (0.65-0.86)</b>       | <b>0.75 (0.62-0.91)</b>     | <b>0.79 (0.73-0.86)</b>          | <b>Placebo</b>          |

#### B. Complications

|                                  |                              |                               |                             |                             |                            |                         |
|----------------------------------|------------------------------|-------------------------------|-----------------------------|-----------------------------|----------------------------|-------------------------|
| <b>Baloxavir<br/>40 or 80 mg</b> | 0.91 (0.53-1.57)             | .                             | .                           | .                           | .                          | <b>0.44 (0.27-0.72)</b> |
| 0.83 (0.52-1.32)                 | <b>Oseltamivir<br/>75 mg</b> | 1.07 (0.63-1.80)              | 1.62 (0.53-4.95)            | .                           | .                          | <b>0.61 (0.49-0.75)</b> |
| 0.78 (0.41-1.46)                 | 0.94 (0.59-1.48)             | <b>Oseltamivir<br/>150 mg</b> | .                           | .                           | .                          | 0.69 (0.42-1.12)        |
| 0.77 (0.37-1.59)                 | 0.93 (0.52-1.68)             | 0.99 (0.48-2.04)              | <b>Peramivir<br/>600 mg</b> | 0.63 (0.15-2.61)            | .                          | 0.82 (0.41-1.64)        |
| 0.75 (0.38-1.49)                 | 0.91 (0.52-1.57)             | 0.97 (0.49-1.92)              | 0.97 (0.47-2.00)            | <b>Peramivir<br/>300 mg</b> | .                          | 0.65 (0.38-1.11)        |
| <b>0.62 (0.39-0.99)</b>          | <b>0.75 (0.59-0.95)</b>      | 0.80 (0.50-1.27)              | 0.80 (0.45-1.43)            | 0.82 (0.49-1.39)            | <b>Zanamivir<br/>10 mg</b> | <b>0.82 (0.72-0.92)</b> |
| <b>0.51 (0.32-0.80)</b>          | <b>0.61 (0.49-0.75)</b>      | 0.65 (0.41-1.02)              | 0.65 (0.37-1.16)            | 0.67 (0.40-1.12)            | <b>0.82 (0.72-0.92)</b>    | <b>Placebo</b>          |

### C. Total adverse events

|                                  |                            |                             |                               |                              |                             |                         |
|----------------------------------|----------------------------|-----------------------------|-------------------------------|------------------------------|-----------------------------|-------------------------|
| <b>Baloxavir<br/>40 or 80 mg</b> | .                          | .                           | .                             | 0.87 (0.76-1.00)             | .                           | <b>0.85 (0.74-0.97)</b> |
| 0.96 (0.80-1.14)                 | <b>Zanamivir<br/>10 mg</b> | .                           | .                             | .                            | .                           | 0.88 (0.78-1.00)        |
| 0.89 (0.77-1.04)                 | 0.93 (0.80-1.08)           | <b>Peramivir<br/>300 mg</b> | .                             | .                            | 0.96 (0.88-1.06)            | 0.96 (0.88-1.05)        |
| 0.86 (0.53-1.42)                 | 0.90 (0.54-1.50)           | 0.97 (0.59-1.60)            | <b>Oseltamivir<br/>150 mg</b> | 1.01 (0.62-1.64)             | .                           | .                       |
| <b>0.87 (0.77-0.99)</b>          | 0.91 (0.78-1.07)           | 0.98 (0.86-1.12)            | 1.01 (0.62-1.64)              | <b>Oseltamivir<br/>75 mg</b> | 1.61 (0.83-3.12)            | 0.95 (0.86-1.05)        |
| 0.87 (0.75-1.01)                 | 0.91 (0.78-1.05)           | 0.98 (0.89-1.07)            | 1.01 (0.61-1.65)              | 0.99 (0.88-1.13)             | <b>Peramivir<br/>600 mg</b> | 0.97 (0.90-1.06)        |
| <b>0.84 (0.74-0.96)</b>          | 0.88 (0.78-1.00)           | 0.95 (0.87-1.03)            | 0.97 (0.60-1.59)              | 0.96 (0.87-1.06)             | 0.97 (0.90-1.05)            | <b>Placebo</b>          |

### D. Nausea

|                            |                                  |                         |                             |                             |                              |                               |
|----------------------------|----------------------------------|-------------------------|-----------------------------|-----------------------------|------------------------------|-------------------------------|
| <b>Zanamivir<br/>10 mg</b> | .                                | 0.55 (0.26-1.17)        | .                           | .                           | .                            | .                             |
| 0.64 (0.27-1.56)           | <b>Baloxavir<br/>40 or 80 mg</b> | 0.74 (0.44-1.22)        | .                           | .                           | <b>0.53 (0.33-0.83)</b>      | .                             |
| 0.55 (0.26-1.17)           | 0.85 (0.54-1.34)                 | <b>Placebo</b>          | 0.77 (0.35-1.65)            | 0.92 (0.42-2.03)            | <b>0.55 (0.42-0.73)</b>      | <b>0.36 (0.23-0.56)</b>       |
| 0.54 (0.19-1.52)           | 0.83 (0.36-1.95)                 | 0.98 (0.48-2.00)        | <b>Peramivir<br/>300 mg</b> | 0.50 (0.13-1.94)            | .                            | .                             |
| 0.48 (0.17-1.34)           | 0.74 (0.32-1.70)                 | 0.87 (0.43-1.75)        | 0.89 (0.37-2.13)            | <b>Peramivir<br/>600 mg</b> | 0.33 (0.01-7.97)             | .                             |
| <b>0.30 (0.13-0.67)</b>    | <b>0.47 (0.30-0.72)</b>          | <b>0.55 (0.42-0.72)</b> | 0.56 (0.26-1.21)            | 0.63 (0.30-1.34)            | <b>Oseltamivir<br/>75 mg</b> | 0.94 (0.68-1.28)              |
| <b>0.26 (0.11-0.60)</b>    | <b>0.40 (0.24-0.67)</b>          | <b>0.47 (0.33-0.67)</b> | 0.48 (0.22-1.07)            | 0.54 (0.25-1.19)            | 0.86 (0.63-1.16)             | <b>Oseltamivir<br/>150 mg</b> |

### E. Vomiting

|                          |                          |                        |                                  |                          |                               |
|--------------------------|--------------------------|------------------------|----------------------------------|--------------------------|-------------------------------|
| <b>Peramivir 300 mg</b>  | 0.61 (0.22-1.71)         | .                      | .                                | .                        | .                             |
| 0.61 (0.22- 1.71)        | <b>Placebo</b>           | 0.91 (0.32-2.55)       | 0.79 (0.15-4.05)                 | <b>0.53 (0.41-0.68)</b>  | <b>0.27 (0.15-0.48)</b>       |
| 0.55 (0.13- 2.37)        | 0.91 (0.32- 2.55)        | <b>Zanamivir 10 mg</b> | .                                | .                        | .                             |
| 0.46 (0.10- 2.15)        | 0.77 (0.25- 2.37)        | 0.84 (0.18- 3.90)      | <b>Baloxavir<br/>40 or 80 mg</b> | 0.70 (0.22-2.28)         | .                             |
| <b>0.32 (0.11- 0.93)</b> | <b>0.53 (0.41- 0.68)</b> | 0.59 (0.20- 1.69)      | 0.69 (0.23- 2.11)                | <b>Oseltamivir 75 mg</b> | 0.96 (0.67-1.37)              |
| <b>0.27 (0.09- 0.82)</b> | <b>0.45 (0.30- 0.66)</b> | 0.49 (0.16- 1.49)      | 0.58 (0.18- 1.87)                | 0.84 (0.60- 1.19)        | <b>Oseltamivir<br/>150 mg</b> |

**eTable 2.** Global Inconsistency of All Outcomes

| <b>Outcome</b>       | <b>Q score</b> | <b>P-value</b> | <b>tau.within</b> | <b>tau2.within</b> |
|----------------------|----------------|----------------|-------------------|--------------------|
| TTAS                 | 2.37 (df=4)    | 0.6689         | 0.0322            | 0.0010             |
| Complications        | 5.05 (df=9)    | 0.8302         | 0.0895            | 0.0080             |
| Total adverse events | 6.42 (df=8)    | 0.6007         | 0                 | 0                  |
| Nausea               | 7.89 (df=5)    | 0.1626         | 0                 | 0                  |
| Vomiting             | 5.76 (df=2)    | 0.0562         | 0                 | 0                  |

## eAppendix 2. Netsplit Analysis of Inconsistency

### TTAS

Random effects model

comparison - Treatment comparison

k - Number of studies providing direct evidence

prop - Direct evidence proportion

nma - Estimated treatment effect (HR) in network meta-analysis

direct - Estimated treatment effect (HR) derived from direct evidence

indir. - Estimated treatment effect (HR) derived from indirect evidence

RoR - Ratio of Ratios (direct versus indirect)

z - z-value of test for disagreement (direct versus indirect)

p-value - p-value of test for disagreement (direct versus indirect)

| Comparison        | k | prop | nma               | 95%-CI direct     | 95%-CI indir.     | 95%-CI RoR        | 95%-CI z | p-value |
|-------------------|---|------|-------------------|-------------------|-------------------|-------------------|----------|---------|
| BAL 40/80:OSE 150 | 0 | 0    | 1.06 (0.91- 1.24) | .                 | 1.06 (0.91- 1.24) | .                 | .        | .       |
| BAL 40/80:OSE 75  | 2 | 0.85 | 1.07 (0.98- 1.16) | 1.05 (0.96- 1.14) | 1.20 (0.97- 1.48) | 0.87 (0.69- 1.10) | -1.15    | 0.2504  |
| BAL 40/80:PER 300 | 0 | 0    | 1.06 (0.86- 1.30) | .                 | 1.06 (0.86- 1.30) | .                 | .        | .       |
| BAL 40/80:PER 600 | 0 | 0    | 1.15 (0.88- 1.50) | .                 | 1.15 (0.88- 1.50) | .                 | .        | .       |
| BAL 40/80:PLA     | 3 | 0.84 | 0.79 (0.73- 0.86) | 0.81 (0.74- 0.89) | 0.71 (0.58- 0.88) | 1.13 (0.90- 1.42) | 1.06     | 0.2906  |
| BAL 40/80:ZAN 10  | 0 | 0    | 1.19 (1.01- 1.40) | .                 | 1.19 (1.01- 1.40) | .                 | .        | .       |
| OSE 150:OSE 75    | 2 | 0.74 | 1.00 (0.87- 1.16) | 1.02 (0.86- 1.20) | 0.96 (0.73- 1.27) | 1.06 (0.77- 1.47) | 0.37     | 0.7141  |
| OSE 150:PER 300   | 0 | 0    | 0.99 (0.78- 1.26) | .                 | 0.99 (0.78- 1.26) | .                 | .        | .       |
| OSE 150:PER 600   | 0 | 0    | 1.08 (0.81- 1.44) | .                 | 1.08 (0.81- 1.44) | .                 | .        | .       |
| OSE 150:PLA       | 2 | 0.78 | 0.75 (0.65- 0.86) | 0.74 (0.63- 0.86) | 0.78 (0.58- 1.06) | 0.95 (0.67- 1.33) | -0.32    | 0.7479  |
| OSE 150:ZAN 10    | 0 | 0    | 1.12 (0.91- 1.36) | .                 | 1.12 (0.91- 1.36) | .                 | .        | .       |
| OSE 75:PER 300    | 0 | 0    | 0.99 (0.81- 1.21) | .                 | 0.99 (0.81- 1.21) | .                 | .        | .       |
| OSE 75:PER 600    | 0 | 0    | 1.08 (0.83- 1.40) | .                 | 1.08 (0.83- 1.40) | .                 | .        | .       |
| OSE 75:PLA        | 9 | 0.98 | 0.74 (0.70- 0.79) | 0.74 (0.69- 0.79) | 0.99 (0.62- 1.56) | 0.75 (0.47- 1.19) | -1.23    | 0.2195  |
| OSE 75:ZAN 10     | 0 | 0    | 1.11 (0.95- 1.30) | .                 | 1.11 (0.95- 1.30) | .                 | .        | .       |
| PER 300:PER 600   | 1 | 0.84 | 1.09 (0.85- 1.40) | 1.01 (0.77- 1.33) | 1.61 (0.87- 2.99) | 0.63 (0.32- 1.24) | -1.35    | 0.1778  |
| PER 300:PLA       | 2 | 1.00 | 0.75 (0.62- 0.91) | 0.75 (0.62- 0.91) | .                 | .                 | .        | .       |
| PER 300:ZAN 10    | 0 | 0    | 1.12 (0.88- 1.43) | .                 | 1.12 (0.88- 1.43) | .                 | .        | .       |
| PER 600:PLA       | 1 | 0.84 | 0.69 (0.54- 0.88) | 0.64 (0.48- 0.84) | 1.02 (0.55- 1.89) | 0.63 (0.32- 1.24) | -1.35    | 0.1778  |
| PER 600:ZAN 10    | 0 | 0    | 1.03 (0.77- 1.37) | .                 | 1.03 (0.77- 1.37) | .                 | .        | .       |
| PLA:ZAN 10        | 3 | 1.00 | 1.50 (1.30- 1.73) | 1.50 (1.30- 1.73) | .                 | .                 | .        | .       |

## Complications

Random effects model

comparison - Treatment comparison

k - Number of studies providing direct evidence

prop - Direct evidence proportion

nma - Estimated treatment effect (HR) in network meta-analysis

direct - Estimated treatment effect (HR) derived from direct evidence

indir. - Estimated treatment effect (HR) derived from indirect evidence

RoR - Ratio of Ratios (direct versus indirect)

z - z-value of test for disagreement (direct versus indirect)

p-value - p-value of test for disagreement (direct versus indirect)

| comparison    | k   | prop | nma  | 95%-CI            | direct            | 95%-CI            | indir.            | 95%-CI | RoR    | 95%-CI | z | p-value |
|---------------|-----|------|------|-------------------|-------------------|-------------------|-------------------|--------|--------|--------|---|---------|
| BAL 40/80:OSE | 150 | 0    | 0    | 0.78 (0.41- 1.46) | .                 | .                 | 0.78 (0.41- 1.46) | .      | .      | .      | . | .       |
| BAL 40/80:OSE | 75  | 2    | 0.74 | 0.83 (0.52- 1.32) | 0.91 (0.53- 1.57) | 0.63 (0.25- 1.58) | 1.45 (0.50- 4.21) | 0.68   | 0.4957 |        |   |         |
| BAL 40/80:PER | 300 | 0    | 0    | 0.75 (0.38- 1.49) | .                 | .                 | 0.75 (0.38- 1.49) | .      | .      | .      | . |         |
| BAL 40/80:PER | 600 | 0    | 0    | 0.77 (0.37- 1.59) | .                 | .                 | 0.77 (0.37- 1.59) | .      | .      | .      | . |         |
| BAL 40/80:PLA | 3   | 0.86 | 0.51 | (0.32- 0.80)      | 0.44 (0.27- 0.72) | 1.17 (0.35- 3.94) | 0.38 (0.10- 1.40) | -1.46  | 0.1441 |        |   |         |
| BAL 40/80:ZAN | 10  | 0    | 0    | 0.62 (0.39- 0.99) | .                 | .                 | 0.62 (0.39- 0.99) | .      | .      | .      | . |         |
| OSE 150:OSE   | 75  | 2    | 0.78 | 1.07 (0.67- 1.69) | 0.94 (0.56- 1.58) | 1.71 (0.64- 4.55) | 0.55 (0.18- 1.67) | -1.06  | 0.2904 |        |   |         |
| OSE 150:PER   | 300 | 0    | 0    | 0.97 (0.49- 1.92) | .                 | .                 | 0.97 (0.49- 1.92) | .      | .      | .      | . |         |
| OSE 150:PER   | 600 | 0    | 0    | 0.99 (0.48- 2.04) | .                 | .                 | 0.99 (0.48- 2.04) | .      | .      | .      | . |         |
| OSE 150:PLA   | 2   | 0.86 | 0.65 | (0.41- 1.02)      | 0.69 (0.42- 1.12) | 0.45 (0.13- 1.53) | 1.53 (0.41- 5.70) | 0.64   | 0.5250 |        |   |         |
| OSE 150:ZAN   | 10  | 0    | 0    | 0.80 (0.50- 1.27) | .                 | .                 | 0.80 (0.50- 1.27) | .      | .      | .      | . |         |
| OSE 75:PER    | 300 | 0    | 0    | 0.91 (0.52- 1.57) | .                 | .                 | 0.91 (0.52- 1.57) | .      | .      | .      | . |         |
| OSE 75:PER    | 600 | 2    | 0.28 | 0.93 (0.52- 1.68) | 1.62 (0.53- 4.95) | 0.75 (0.38- 1.51) | 2.14 (0.57- 7.99) | 1.13   | 0.2570 |        |   |         |
| OSE 75:PLA    | 9   | 0.97 | 0.61 | (0.49- 0.75)      | 0.61 (0.49- 0.75) | 0.74 (0.21- 2.62) | 0.82 (0.23- 2.93) | -0.31  | 0.7544 |        |   |         |
| OSE 75:ZAN    | 10  | 0    | 0    | 0.75 (0.59- 0.95) | .                 | .                 | 0.75 (0.59- 0.95) | .      | .      | .      | . |         |
| PER 300:PER   | 600 | 2    | 0.25 | 1.03 (0.50- 2.11) | 1.60 (0.38- 6.66) | 0.88 (0.38- 2.03) | 1.81 (0.35- 9.45) | 0.70   | 0.4826 |        |   |         |
| PER 300:PLA   | 2   | 0.92 | 0.67 | (0.40- 1.12)      | 0.65 (0.38- 1.11) | 0.95 (0.15- 6.00) | 0.68 (0.10- 4.63) | -0.39  | 0.6966 |        |   |         |
| PER 300:ZAN   | 10  | 0    | 0    | 0.82 (0.49- 1.39) | .                 | .                 | 0.82 (0.49- 1.39) | .      | .      | .      | . |         |
| PER 600:PLA   | 3   | 0.68 | 0.65 | (0.37- 1.16)      | 0.82 (0.41- 1.64) | 0.40 (0.15- 1.10) | 2.05 (0.61- 6.94) | 1.15   | 0.2489 |        |   |         |
| PER 600:ZAN   | 10  | 0    | 0    | 0.80 (0.45- 1.43) | .                 | .                 | 0.80 (0.45- 1.43) | .      | .      | .      | . |         |
| ZAN 10:PLA    | 6   | 1.00 | 0.82 | (0.72- 0.92)      | 0.82 (0.72- 0.92) | .                 | .                 | .      | .      | .      | . |         |

## Total adverse events

Random effects model

comparison - Treatment comparison

k - Number of studies providing direct evidence

prop - Direct evidence proportion

nma - Estimated treatment effect (HR) in network meta-analysis

direct - Estimated treatment effect (HR) derived from direct evidence

indir. - Estimated treatment effect (HR) derived from indirect evidence

RoR - Ratio of Ratios (direct versus indirect)

z - z-value of test for disagreement (direct versus indirect)

p-value - p-value of test for disagreement (direct versus indirect)

| comparison        | k    | prop | nma          | 95%-CI       | direct       | 95%-CI       | indir.       | 95%-CI       | RoR          | 95%-CI       | z      | p-value |
|-------------------|------|------|--------------|--------------|--------------|--------------|--------------|--------------|--------------|--------------|--------|---------|
| BAL 40/80:OSE 150 | 0    | 0    | 0.86         | (0.53- 1.42) | .            | .            | 0.86         | (0.53- 1.42) | .            | .            | .      | .       |
| BAL 40/80:OSE 75  | 2    | 0.87 | 0.87         | (0.77- 0.99) | 0.87         | (0.76- 1.00) | 0.90         | (0.64- 1.27) | 0.97         | (0.67- 1.40) | -0.18  | 0.8597  |
| BAL 40/80:PER 300 | 0    | 0    | 0.89         | (0.77- 1.04) | .            | .            | 0.89         | (0.77- 1.04) | .            | .            | .      | .       |
| BAL 40/80:PER 600 | 0    | 0    | 0.87         | (0.75- 1.01) | .            | .            | 0.87         | (0.75- 1.01) | .            | .            | .      | .       |
| BAL 40/80:PLA 3   | 0.88 | 0.84 | (0.74- 0.96) | 0.85         | (0.74- 0.97) | 0.81         | (0.57- 1.17) | 1.04         | (0.71- 1.53) | 0.21         | 0.8335 |         |
| BAL 40/80:ZAN 10  | 0    | 0    | 0.96         | (0.80- 1.14) | .            | .            | 0.96         | (0.80- 1.14) | .            | .            | .      | .       |
| OSE 150:OSE 75    | 1    | 1.00 | 1.01         | (0.62- 1.64) | 1.01         | (0.62- 1.64) | .            | .            | .            | .            | .      | .       |
| OSE 150:PER 300   | 0    | 0    | 1.03         | (0.63- 1.70) | .            | .            | 1.03         | (0.63- 1.70) | .            | .            | .      | .       |
| OSE 150:PER 600   | 0    | 0    | 1.01         | (0.61- 1.65) | .            | .            | 1.01         | (0.61- 1.65) | .            | .            | .      | .       |
| OSE 150:PLA 0     | 0    | 0.97 | (0.60- 1.59) | .            | .            | 0.97         | (0.60- 1.59) | .            | .            | .            | .      | .       |
| OSE 150:ZAN 10    | 0    | 0    | 1.11         | (0.67- 1.84) | .            | .            | 1.11         | (0.67- 1.84) | .            | .            | .      | .       |
| OSE 75:PER 300    | 0    | 0    | 1.02         | (0.89- 1.16) | .            | .            | 1.02         | (0.89- 1.16) | .            | .            | .      | .       |
| OSE 75:PER 600    | 2    | 0.04 | 0.99         | (0.88- 1.13) | 1.61         | (0.83- 3.12) | 0.98         | (0.86- 1.11) | 1.65         | (0.84- 3.24) | 1.45   | 0.1460  |
| OSE 75:PLA 8      | 0.97 | 0.96 | (0.87- 1.06) | 0.95         | (0.86- 1.05) | 1.52         | (0.83- 2.78) | 0.62         | (0.34- 1.15) | -1.51        | 0.1316 |         |
| OSE 75:ZAN 10     | 0    | 0    | 1.09         | (0.93- 1.28) | .            | .            | 1.09         | (0.93- 1.28) | .            | .            | .      | .       |
| PER 300:PER 600   | 2    | 0.93 | 0.98         | (0.89- 1.07) | 0.96         | (0.88- 1.06) | 1.12         | (0.80- 1.57) | 0.86         | (0.61- 1.22) | -0.86  | 0.3884  |
| PER 300:PLA 2     | 0.95 | 0.95 | (0.87- 1.03) | 0.96         | (0.88- 1.05) | 0.72         | (0.48- 1.07) | 1.34         | (0.89- 2.01) | 1.39         | 0.1642 |         |
| PER 300:ZAN 10    | 0    | 0    | 1.07         | (0.92- 1.25) | .            | .            | 1.07         | (0.92- 1.25) | .            | .            | .      | .       |
| PER 600:PLA 3     | 0.96 | 0.97 | (0.90- 1.05) | 0.97         | (0.90- 1.06) | 0.88         | (0.59- 1.30) | 1.11         | (0.74- 1.66) | 0.50         | 0.6158 |         |
| PER 600:ZAN 10    | 0    | 0    | 1.10         | (0.95- 1.28) | .            | .            | 1.10         | (0.95- 1.28) | .            | .            | .      | .       |
| ZAN 10:PLA 6      | 1.00 | 0.88 | (0.78- 1.00) | 0.88         | (0.78- 1.00) | .            | .            | .            | .            | .            | .      | .       |



## Nausea

Random effects model

comparison - Treatment comparison

k - Number of studies providing direct evidence

prop - Direct evidence proportion

nma - Estimated treatment effect (HR) in network meta-analysis

direct - Estimated treatment effect (HR) derived from direct evidence

indir. - Estimated treatment effect (HR) derived from indirect evidence

RoR - Ratio of Ratios (direct versus indirect)

z - z-value of test for disagreement (direct versus indirect)

p-value - p-value of test for disagreement (direct versus indirect)

| comparison         | k        | prop        | nma         | 95%-CI              | direct                   | 95%-CI                   | indir.                   | 95%-CI      | RoR           | 95%-CI | z | p-value |
|--------------------|----------|-------------|-------------|---------------------|--------------------------|--------------------------|--------------------------|-------------|---------------|--------|---|---------|
| BAL 40/80:OSE      | 150      | 0           | 0           | 0.40 (0.24- 0.67)   | .                        | .                        | 0.40 (0.24- 0.67)        | .           | .             | .      | . | .       |
| BAL 40/80:OSE      | 75       | 2           | 0.92        | 0.47 (0.30- 0.72)   | 0.53 (0.33- 0.83)        | 0.12 (0.03- 0.55)        | 4.28 (0.89- 20.56)       | 1.82        | 0.0694        |        |   |         |
| BAL 40/80:PER      | 300      | 0           | 0           | 0.83 (0.36- 1.95)   | .                        | .                        | 0.83 (0.36- 1.95)        | .           | .             | .      | . | .       |
| BAL 40/80:PER      | 600      | 0           | 0           | 0.74 (0.32- 1.70)   | .                        | .                        | 0.74 (0.32- 1.70)        | .           | .             | .      | . | .       |
| BAL 40/80:PLA      | 2        | 0.81        | 0.85        | (0.54- 1.34)        | 0.74 (0.44- 1.22)        | 1.57 (0.56- 4.42)        | 0.47 (0.15- 1.49)        | -1.28       | 0.1995        |        |   |         |
| BAL 40/80:ZAN      | 10       | 0           | 0           | 1.55 (0.64- 3.77)   | .                        | .                        | 1.55 (0.64- 3.77)        | .           | .             | .      | . | .       |
| OSE 150:OSE        | 75       | 2           | 0.92        | 1.17 (0.86- 1.58)   | 1.07 (0.78- 1.46)        | 3.14 (1.10- 8.97)        | 0.34 (0.11- 1.01)        | -1.93       | 0.0531        |        |   |         |
| OSE 150:PER        | 300      | 0           | 0           | 2.08 (0.93- 4.64)   | .                        | .                        | 2.08 (0.93- 4.64)        | .           | .             | .      | . | .       |
| OSE 150:PER        | 600      | 0           | 0           | 1.84 (0.84- 4.04)   | .                        | .                        | 1.84 (0.84- 4.04)        | .           | .             | .      | . | .       |
| <b>OSE 150:PLA</b> | <b>2</b> | <b>0.65</b> | <b>2.13</b> | <b>(1.49- 3.04)</b> | <b>2.78 (1.78- 4.34)</b> | <b>1.30 (0.71- 2.38)</b> | <b>2.13 (1.01- 4.51)</b> | <b>1.98</b> | <b>0.0480</b> |        |   |         |
| OSE 150:ZAN        | 10       | 0           | 0           | 3.88 (1.68- 8.98)   | .                        | .                        | 3.88 (1.68- 8.98)        | .           | .             | .      | . | .       |
| OSE 75:PER         | 300      | 0           | 0           | 1.78 (0.83- 3.84)   | .                        | .                        | 1.78 (0.83- 3.84)        | .           | .             | .      | . | .       |
| OSE 75:PER         | 600      | 1           | 0.06        | 1.58 (0.75- 3.35)   | 3.00 (0.13- 71.76)       | 1.52 (0.70- 3.29)        | 1.97 (0.08- 51.72)       | 0.41        | 0.6839        |        |   |         |
| OSE 75:PLA         | 8        | 0.99        | 1.82        | (1.38- 2.41)        | 1.81 (1.37- 2.39)        | 3.07 (0.29- 32.70)       | 0.59 (0.05- 6.38)        | -0.43       | 0.6639        |        |   |         |
| OSE 75:ZAN         | 10       | 0           | 0           | 3.33 (1.48- 7.46)   | .                        | .                        | 3.33 (1.48- 7.46)        | .           | .             | .      | . | .       |
| PER 300:PER        | 600      | 1           | 0.42        | 0.89 (0.37- 2.13)   | 0.50 (0.13- 1.94)        | 1.34 (0.42- 4.24)        | 0.37 (0.06- 2.22)        | -1.08       | 0.2784        |        |   |         |
| PER 300:PLA        | 2        | 0.87        | 1.02        | (0.50- 2.10)        | 1.31 (0.60- 2.82)        | 0.21 (0.03- 1.48)        | 6.31 (0.76- 52.36)       | 1.71        | 0.0878        |        |   |         |
| PER 300:ZAN        | 10       | 0           | 0           | 1.87 (0.66- 5.30)   | .                        | .                        | 1.87 (0.66- 5.30)        | .           | .             | .      | . | .       |
| PER 600:PLA        | 2        | 0.80        | 1.15        | (0.57- 2.33)        | 1.08 (0.49- 2.37)        | 1.50 (0.31- 7.22)        | 0.72 (0.12- 4.18)        | -0.36       | 0.7152        |        |   |         |
| PER 600:ZAN        | 10       | 0           | 0           | 2.10 (0.75- 5.92)   | .                        | .                        | 2.10 (0.75- 5.92)        | .           | .             | .      | . | .       |
| ZAN 10:PLA         | 3        | 1.00        | 0.55        | (0.26- 1.17)        | 0.55 (0.26- 1.17)        | .                        | .                        | .           | .             | .      | . | .       |

## Vomiting

Random effects model

comparison - Treatment comparison

k - Number of studies providing direct evidence

prop - Direct evidence proportion

nma - Estimated treatment effect (HR) in network meta-analysis

direct - Estimated treatment effect (HR) derived from direct evidence

indir. - Estimated treatment effect (HR) derived from indirect evidence

RoR - Ratio of Ratios (direct versus indirect)

z - z-value of test for disagreement (direct versus indirect)

p-value - p-value of test for disagreement (direct versus indirect)

| comparison            | k        | prop        | nma         | 95%-CI direct       | 95%-CI indir.            | 95%-CI RoR                | 95%-CI z                 | p-value             |
|-----------------------|----------|-------------|-------------|---------------------|--------------------------|---------------------------|--------------------------|---------------------|
| BAL 40/80:OSE         | 150      | 0           | 0           | 0.58 (0.18- 1.87)   | .                        | 0.58 (0.18- 1.87)         | .                        | .                   |
| BAL 40/80:OSE         | 75       | 1           | 0.89        | 0.69 (0.23- 2.11)   | 0.70 (0.22- 2.28)        | 0.64 (0.02- 18.33)        | 1.10 (0.03- 38.40)       | 0.05 0.9600         |
| BAL 40/80:PER         | 300      | 0           | 0           | 2.15 (0.47- 9.95)   | .                        | 2.15 (0.47- 9.95)         | .                        | .                   |
| BAL 40/80:PLA         | 1        | 0.48        | 1.31        | (0.42- 4.03)        | 1.27 (0.25- 6.49)        | 1.34 (0.28- 6.37)         | 0.94 (0.10- 9.03)        | -0.05 0.9600        |
| BAL 40/80:ZAN         | 10       | 0           | 0           | 1.18 (0.26- 5.46)   | .                        | 1.18 (0.26- 5.46)         | .                        | .                   |
| <b>OSE 150:OSE 75</b> | <b>2</b> | <b>0.92</b> | <b>1.19</b> | <b>(0.84- 1.68)</b> | <b>1.05 (0.73- 1.50)</b> | <b>4.91 (1.48- 16.30)</b> | <b>0.21 (0.06- 0.74)</b> | <b>-2.42 0.0154</b> |
| OSE 150:PER           | 300      | 0           | 0           | 3.69 (1.22- 11.17)  | .                        | 3.69 (1.22- 11.17)        | .                        | .                   |
| <b>OSE 150:PLA</b>    | <b>2</b> | <b>0.47</b> | <b>2.24</b> | <b>(1.51- 3.32)</b> | <b>3.70 (2.08- 6.57)</b> | <b>1.43 (0.83- 2.46)</b>  | <b>2.59 (1.17- 5.72)</b> | <b>2.36 0.0184</b>  |
| OSE 150:ZAN           | 10       | 0           | 0           | 2.03 (0.67- 6.12)   | .                        | 2.03 (0.67- 6.12)         | .                        | .                   |
| OSE 75:PER            | 300      | 0           | 0           | 3.10 (1.07- 8.99)   | .                        | 3.10 (1.07- 8.99)         | .                        | .                   |
| OSE 75:PLA            | 7        | 1.00        | 1.88        | (1.47- 2.41)        | 1.88 (1.47- 2.41)        | .                         | .                        | .                   |
| OSE 75:ZAN            | 10       | 0           | 0           | 1.71 (0.59- 4.93)   | .                        | 1.71 (0.59- 4.93)         | .                        | .                   |
| PER 300:PLA           | 1        | 1.00        | 0.61        | (0.22- 1.71)        | 0.61 (0.22- 1.71)        | .                         | .                        | .                   |
| PER 300:ZAN           | 10       | 0           | 0           | 0.55 (0.13- 2.37)   | .                        | 0.55 (0.13- 2.37)         | .                        | .                   |
| ZAN 10:PLA            | 1        | 1.00        | 1.10        | (0.39- 3.09)        | 1.10 (0.39- 3.09)        | .                         | .                        | .                   |

**eTable 3. Sensitivity Analysis**

**Studies at serious risk of bias (ROB) of overall domains and blinding domain were excluded.**

For the TTAS outcome, 1 trial (Lin, 2006) was excluded in both domains.

For the nausea outcome, 1 trial (Lin, 2006) was excluded in the overall domain; (Nakamura, 2017) and (Lin, 2006) were excluded in the domain of blinding.

No trial had a high risk of bias for the vomiting outcome.

**Time to symptom alleviation (TTAS)**

| Comparison           | Base data |      |                  | Overall / Blinding domains |      |                   |
|----------------------|-----------|------|------------------|----------------------------|------|-------------------|
|                      | No.       | Prop | RR (95% CI)      | No.                        | Prop | RR (95% CI)       |
| BAL 40/80 vs OSE 150 | 0         | 0    | 1.06 (0.91-1.24) | 0                          | 0    | 1.06 (0.91-1.24)  |
| BAL 40/80 vs OSE 75  | 2         | 0.85 | 1.07 (0.98-1.16) | 2                          | 0.85 | 1.06 (0.98- 1.16) |
| BAL 40/80 vs PER 300 | 0         | 0    | 1.06 (0.86-1.30) | 0                          | 0    | 1.06 (0.86- 1.31) |
| BAL 40/80 vs PER 600 | 0         | 0    | 1.15 (0.88-1.50) | 0                          | 0    | 1.16 (0.89- 1.51) |
| BAL 40/80 vs PLA     | 3         | 0.84 | 0.79 (0.73-0.86) | 3                          | 0.84 | 0.80 (0.73- 0.87) |
| BAL 40/80 vs ZAN 10  | 0         | 0    | 1.19 (1.01-1.40) | 0                          | 0    | 1.19 (1.01- 1.41) |
| OSE 150 vs OSE 75    | 2         | 0.74 | 1.00 (0.87-1.16) | 2                          | 0.74 | 1.00 (0.87- 1.15) |
| OSE 150 vs PER 300   | 0         | 0    | 0.99 (0.78-1.26) | 0                          | 0    | 1.00 (0.79- 1.27) |
| OSE 150 vs PER 600   | 0         | 0    | 1.08 (0.81-1.44) | 0                          | 0    | 1.09 (0.82- 1.45) |
| OSE 150 vs PLA       | 2         | 0.78 | 0.75 (0.65-0.86) | 2                          | 0.79 | 0.75 (0.65- 0.86) |
| OSE 150 vs ZAN 10    | 0         | 0    | 1.12 (0.91-1.36) | 0                          | 0    | 1.12 (0.92- 1.37) |
| OSE 75 vs PER 300    | 0         | 0    | 0.99 (0.81-1.21) | 0                          | 0    | 1.00 (0.81- 1.22) |
| OSE 75 vs PER 600    | 0         | 0    | 1.08 (0.83-1.40) | 0                          | 0    | 1.09 (0.84- 1.41) |
| <b>OSE 75 vs PLA</b> | 9         | 0.98 | 0.74 (0.70-0.79) | <b>8*</b>                  | 0.98 | 0.75 (0.70- 0.80) |
| OSE 75 vs ZAN 10     | 0         | 0    | 1.11 (0.95-1.30) | 0                          | 0    | 1.12 (0.96- 1.31) |
| PER 300 vs PER 600   | 1         | 0.84 | 1.09 (0.85-1.40) | 1                          | 0.84 | 1.09 (0.85- 1.40) |
| PER 300 vs PLA       | 2         | 1.00 | 0.75 (0.62-0.91) | 2                          | 1.00 | 0.75 (0.62- 0.91) |
| PER 300 vs ZAN 10    | 0         | 0    | 1.12 (0.88-1.43) | 0                          | 0    | 1.12 (0.88- 1.43) |
| PER 600 vs PLA       | 1         | 0.84 | 0.69 (0.54-0.88) | 1                          | 0.84 | 0.69 (0.54- 0.88) |
| PER 600 vs ZAN 10    | 0         | 0    | 1.03 (0.77-1.37) | 0                          | 0    | 1.03 (0.77- 1.37) |
| PLA vs ZAN 10        | 3         | 1.00 | 1.50 (1.30-1.73) | 3                          | 1.00 | 1.50 (1.30- 1.73) |

No: numbers of studies included. Prop: Direct evidence proportion. RR: risk ratio. CI: confident interval.

\*Excluding Lin, 2006 in both domains.

Nausea

| Comparison               | Base data |      |                  | Overall domains |      |                  | Blinding domains |      |                  |
|--------------------------|-----------|------|------------------|-----------------|------|------------------|------------------|------|------------------|
|                          | No.       | Prop | RR (95% CI)      | No.             | Prop | RR (95% CI)      | No.              | Prop | RR (95% CI)      |
| BAL 40/80 vs OSE 150     | 0         | 0    | 0.40 (0.24-0.67) | 0               | 0    | 0.40 (0.24-0.67) | 0                | 0    | 0.40 (0.24-0.67) |
| BAL 40/80 vs OSE 75      | 2         | 0.92 | 0.47 (0.30-0.72) | 2               | 0.92 | 0.47 (0.30-0.73) | 2                | 0.92 | 0.47 (0.30-0.73) |
| BAL 40/80 vs PER 300     | 0         | 0    | 0.83 (0.36-1.95) | 0               | 0    | 0.83 (0.35-1.94) | 0                | 0    | 0.82 (0.35-1.92) |
| BAL 40/80 vs PER 600     | 0         | 0    | 0.74 (0.32-1.70) | 0               | 0    | 0.73 (0.32-1.69) | 0                | 0    | 0.71 (0.30-1.66) |
| BAL 40/80 vs PLA         | 2         | 0.81 | 0.85 (0.54-1.34) | 2               | 0.81 | 0.85 (0.54-1.34) | 2                | 0.81 | 0.85 (0.54-1.33) |
| BAL 40/80 vs ZAN 10      | 0         | 0    | 1.55 (0.64-3.77) | 0               | 0    | 1.55 (0.64-3.75) | 0                | 0    | 1.54 (0.64-3.74) |
| OSE 150 vs OSE 75        | 2         | 0.92 | 1.17 (0.86-1.58) | 2               | 0.92 | 1.17 (0.87-1.58) | 2                | 0.92 | 1.17 (0.87-1.58) |
| OSE 150 vs PER 300       | 0         | 0    | 2.08 (0.93-4.64) | 0               | 0    | 2.07 (0.93-4.61) | 0                | 0    | 2.04 (0.92-4.56) |
| OSE 150 vs PER 600       | 0         | 0    | 1.84 (0.84-4.04) | 0               | 0    | 1.83 (0.84-4.02) | 0                | 0    | 1.77 (0.79-3.95) |
| OSE 150 vs PLA           | 2         | 0.65 | 2.13 (1.49-3.04) | 2               | 0.65 | 2.11 (1.48-3.03) | 2                | 0.65 | 2.11 (1.47-3.02) |
| OSE 150 vs ZAN 10        | 0         | 0    | 3.88 (1.68-8.98) | 0               | 0    | 3.86 (1.67-8.93) | 0                | 0    | 3.84 (1.66-8.89) |
| OSE 75 vs PER 300        | 0         | 0    | 1.78 (0.83-3.84) | 0               | 0    | 1.77 (0.82-3.81) | 0                | 0    | 1.75 (0.81-3.77) |
| <b>OSE 75 vs PER 600</b> | 1         | 0.06 | 1.58 (0.75-3.35) | 1               | 0.06 | 1.57 (0.74-3.32) | <b>0†</b>        | 0    | 1.51 (0.70-3.26) |
| <b>OSE 75 vs PLA</b>     | 8         | 0.99 | 1.82 (1.38-2.41) | <b>7*</b>       | 0.99 | 1.81 (1.37-2.39) | <b>7†</b>        | 0.99 | 1.80 (1.36-2.38) |
| OSE 75 vs ZAN 10         | 0         | 0    | 3.33 (1.48-7.46) | 0               | 0    | 3.30 (1.47-7.40) | 0                | 0    | 3.28 (1.46-7.36) |
| PER 300 vs PER 600       | 1         | 0.42 | 0.89 (0.37-2.13) | 1               | 0.42 | 0.89 (0.37-2.13) | 1                | 0.43 | 0.86 (0.36-2.10) |
| PER 300 vs PLA           | 2         | 0.87 | 1.02 (0.50-2.10) | 2               | 0.87 | 1.02 (0.50-2.10) | 2                | 0.87 | 1.03 (0.50-2.11) |
| PER 300 vs ZAN 10        | 0         | 0    | 1.87 (0.66-5.30) | 0               | 0    | 1.86 (0.66-5.30) | 0                | 0    | 1.88 (0.66-5.35) |
| PER 600 vs PLA           | 2         | 0.80 | 1.15 (0.57-2.33) | 2               | 0.80 | 1.15 (0.57-2.33) | 2                | 0.84 | 1.19 (0.58-2.45) |
| PER 600 vs ZAN 10        | 0         | 0    | 2.10 (0.75-5.92) | 0               | 0    | 2.10 (0.75-5.92) | 0                | 0    | 2.18 (0.76-6.19) |
| PLA vs ZAN 10            | 3         | 1.00 | 0.55 (0.26-1.17) | 3               | 1.00 | 0.55 (0.26-1.17) | 3                | 1.00 | 0.55 (0.26-1.17) |

No: numbers of studies included. Prop: Direct evidence proportion. RR: risk ratio. CI: confident interval.

\*Excluding Lin, 2006 in overall domains.

†Excluding Nakamura, 2017 and Lin, 2006 in blinding domain.

**eTable 4.** Mantel-Haenszel (MH) Method for Binary Outcomes

| Outcomes      | Network meta-analysis (ref = PLA) |                       |                       |
|---------------|-----------------------------------|-----------------------|-----------------------|
|               | Comparison*                       | Base data RR (95% CI) | MH method OR (95% CI) |
| Complications | BAL 40/80                         | 0.51 (0.32- 0.80)     | 0.45 (0.28- 0.71)     |
|               | OSE 150                           | 0.65 (0.41- 1.02)     | 0.60 (0.36- 0.99)     |
|               | OSE 75                            | 0.61 (0.49- 0.75)     | 0.56 (0.44- 0.72)     |
|               | PER 300                           | 0.67 (0.40- 1.12)     | 0.64 (0.35- 1.14)     |
|               | PER 600                           | 0.65 (0.37- 1.16)     | 0.58 (0.30- 1.13)     |
|               | ZAN 10                            | 0.82 (0.72- 0.92)     | 0.73 (0.61- 0.87)     |
|               | Total adverse events              | BAL 40/80             | 0.84 (0.74- 0.96)     |
| OSE 150       |                                   | 0.97 (0.60- 1.59)     | 0.99 (0.54- 1.79)     |
| OSE 75        |                                   | 0.96 (0.87- 1.06)     | 0.97 (0.85- 1.12)     |
| PER 300       |                                   | 0.95 (0.87- 1.03)     | 0.77 (0.53- 1.13)     |
| PER 600       |                                   | 0.97 (0.90- 1.05)     | 0.75 (0.53- 1.04)     |
| ZAN 10        |                                   | 0.88 (0.78- 1.00)     | 0.84 (0.70- 1.00)     |
| Nausea        |                                   | BAL 40/80             | 0.85 (0.54- 1.34)     |
|               | OSE 150                           | 2.13 (1.49- 3.04)     | 2.34 (1.57- 3.49)     |
|               | OSE 75                            | 1.82 (1.38- 2.41)     | 1.92 (1.44- 2.57)     |
|               | PER 300                           | 1.02 (0.50- 2.10)     | 1.03 (0.48- 2.21)     |
|               | PER 600                           | 1.15 (0.57- 2.33)     | 1.18 (0.56- 2.48)     |
|               | ZAN 10                            | 0.55 (0.26- 1.17)     | 0.54 (0.25- 1.17)     |
|               | Vomiting                          | BAL 40/80             | 1.31 (0.42- 4.03)     |
| OSE 150       |                                   | 2.24 (1.51- 3.32)     | 2.56 (1.64- 3.98)     |
| OSE 75        |                                   | 1.88 (1.47- 2.41)     | 2.11 (1.59- 2.81)     |
| PER 300       |                                   | 0.61 (0.22- 1.71)     | 0.59 (0.20- 1.75)     |
| ZAN 10        |                                   | 1.10 (0.39- 3.09)     | 1.11 (0.38- 3.20)     |

RR: risk ratio. OR: odds ratio. CI: confident interval.  
 \*Comparison: antiviral agents comparing placebo.

**eFigure 4.** Comparison-Adjusted Funnel Plot

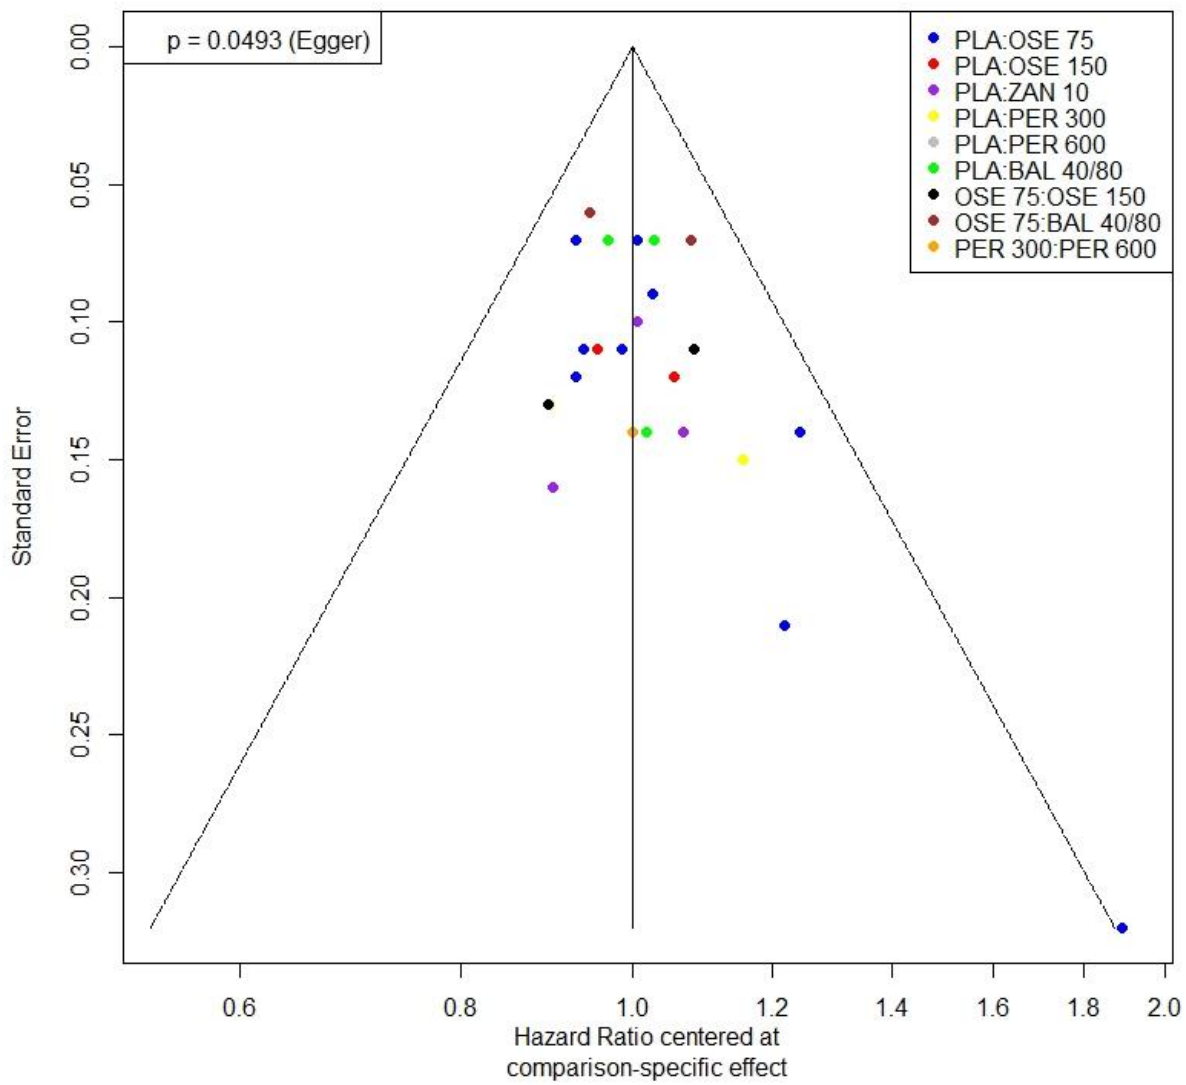

**eTable 5.** Certainty of Direct Evidence Assessment

| TTAS                |     |                          |                 |              |                      |                  |                       |
|---------------------|-----|--------------------------|-----------------|--------------|----------------------|------------------|-----------------------|
| Comparison          | No. | Risk of bias             | Inconsistency   | Indirectness | Publication bias     | HR (95% CI)      | Certainty of evidence |
| BAL 40/80 vs OSE 75 | 2   | Serious <sup>5</sup>     | Not Serious     | Not Serious  | Unclear <sup>2</sup> | 1.05 (0.96-1.14) | Moderate              |
| BAL 40/80 vs PLA    | 3   | Serious <sup>5</sup>     | Not Serious     | Not Serious  | Unclear <sup>2</sup> | 0.81 (0.74-0.89) | Moderate              |
| OSE 150 vs OSE 75   | 2   | Not Serious              | Not Serious     | Not Serious  | Unclear <sup>2</sup> | 1.02 (0.86-1.20) | High                  |
| OSE 150 vs PLA      | 2   | Not Serious              | Not Serious     | Not Serious  | Unclear <sup>2</sup> | 0.74 (0.63-0.86) | High                  |
| OSE 75 vs PLA       | 9   | Serious <sup>3,4,5</sup> | Not Serious     | Not Serious  | Unclear <sup>2</sup> | 0.74 (0.69-0.79) | Moderate              |
| PER 300 vs PER 600  | 1   | Not Serious              | NA <sup>1</sup> | Not Serious  | Unclear <sup>2</sup> | 1.01 (0.77-1.33) | High                  |
| PER 300 vs PLA      | 2   | Not Serious              | Not Serious     | Not Serious  | Unclear <sup>2</sup> | 0.75 (0.62-0.91) | High                  |
| PER 600 vs PLA      | 1   | Not Serious              | NA <sup>1</sup> | Not Serious  | Unclear <sup>2</sup> | 0.64 (0.48-0.84) | High                  |
| PLA vs ZAN 10       | 3   | Not Serious              | Not Serious     | Not Serious  | Unclear <sup>2</sup> | 1.50 (1.30-1.73) | High                  |
| Complications       |     |                          |                 |              |                      |                  |                       |
| BAL 40/80 vs OSE 75 | 2   | Serious <sup>5</sup>     | Not Serious     | Not Serious  | Unclear <sup>2</sup> | 0.91 (0.53-1.57) | Moderate              |
| BAL 40/80 vs PLA    | 3   | Serious <sup>5</sup>     | Not Serious     | Not Serious  | Unclear <sup>2</sup> | 0.44 (0.27-0.72) | Moderate              |
| OSE 150 vs OSE 75   | 2   | Not Serious              | Not Serious     | Not Serious  | Unclear <sup>2</sup> | 0.94 (0.56-1.58) | High                  |
| OSE 150 vs PLA      | 2   | Not Serious              | Not Serious     | Not Serious  | Unclear <sup>2</sup> | 0.69 (0.42-1.12) | High                  |
| OSE 75 vs PER 600   | 2   | Serious <sup>3</sup>     | Not Serious     | Not Serious  | Unclear <sup>2</sup> | 1.62 (0.53-4.95) | Moderate              |
| OSE 75 vs PLA       | 9   | Serious <sup>3,4,5</sup> | Not Serious     | Not Serious  | Unclear <sup>2</sup> | 0.61 (0.49-0.75) | Moderate              |
| PER 300 vs PER 600  | 2   | Not Serious              | Not Serious     | Not Serious  | Unclear <sup>2</sup> | 1.60 (0.38-6.66) | High                  |
| PER 300 vs PLA      | 2   | Not Serious              | Not Serious     | Not Serious  | Unclear <sup>2</sup> | 0.65 (0.38-1.11) | High                  |
| PER 600 vs PLA      | 3   | Not Serious              | Not Serious     | Not Serious  | Unclear <sup>2</sup> | 0.82 (0.41-1.64) | High                  |
| ZAN 10 vs PLA       | 6   | Not Serious              | Not Serious     | Not Serious  | Unclear <sup>2</sup> | 0.82 (0.72-0.92) | High                  |
| Any adverse event   |     |                          |                 |              |                      |                  |                       |
| BAL 40/80 vs OSE 75 | 2   | Serious <sup>5</sup>     | Not Serious     | Not Serious  | Unclear <sup>2</sup> | 0.87 (0.76-1.00) | Moderate              |
| BAL 40/80 vs PLA    | 3   | Serious <sup>5</sup>     | Not Serious     | Not Serious  | Unclear <sup>2</sup> | 0.85 (0.74-0.97) | Moderate              |
| OSE 150 vs OSE 75   | 1   | Not Serious              | NA <sup>1</sup> | Not Serious  | Unclear <sup>2</sup> | 1.01 (0.62-1.64) | High                  |
| OSE 75 vs PER 600   | 2   | Serious <sup>3</sup>     | Not Serious     | Not Serious  | Unclear <sup>2</sup> | 1.61 (0.83-3.12) | Moderate              |
| OSE 75 vs PLA       | 8   | Serious <sup>3,4,5</sup> | Not Serious     | Not Serious  | Unclear <sup>2</sup> | 0.95 (0.86-1.05) | Moderate              |
| PER 300 vs PER 600  | 2   | Not Serious              | Not Serious     | Not Serious  | Unclear <sup>2</sup> | 0.96 (0.88-1.06) | High                  |
| PER 300 vs PLA      | 2   | Not Serious              | Not Serious     | Not Serious  | Unclear <sup>2</sup> | 0.96 (0.88-1.05) | High                  |
| PER 600 vs PLA      | 3   | Not Serious              | Not Serious     | Not Serious  | Unclear <sup>2</sup> | 0.97 (0.90-1.06) | High                  |

|                     |   |                          |                 |             |                      |                   |                 |
|---------------------|---|--------------------------|-----------------|-------------|----------------------|-------------------|-----------------|
| ZAN 10 vs PLA       | 6 | Not Serious              | Not Serious     | Not Serious | Unclear <sup>2</sup> | 0.88 (0.78-1.00)  | <b>High</b>     |
| <b>Nausea</b>       |   |                          |                 |             |                      |                   |                 |
| BAL 40/80 vs OSE 75 | 2 | Serious <sup>5</sup>     | Not Serious     | Not Serious | Unclear <sup>2</sup> | 0.53 (0.33-0.83)  | <b>Moderate</b> |
| BAL 40/80 vs PLA    | 2 | Serious <sup>5</sup>     | Not Serious     | Not Serious | Unclear <sup>2</sup> | 0.74 (0.44-1.22)  | <b>Moderate</b> |
| OSE 150 vs OSE 75   | 2 | Not Serious              | Not Serious     | Not Serious | Unclear <sup>2</sup> | 1.07 (0.78-1.46)  | <b>High</b>     |
| OSE 150 vs PLA      | 2 | Not Serious              | Not Serious     | Not Serious | Unclear <sup>2</sup> | 2.78 (1.78-4.34)  | <b>High</b>     |
| OSE 75 vs PER 600   | 1 | Serious <sup>3</sup>     | NA <sup>1</sup> | Not Serious | Unclear <sup>2</sup> | 3.00 (0.13-71.76) | <b>Moderate</b> |
| OSE 75 vs PLA       | 8 | Serious <sup>3,4,5</sup> | Not Serious     | Not Serious | Unclear <sup>2</sup> | 1.81 (1.37-2.39)  | <b>Moderate</b> |
| PER 300 vs PER 600  | 1 | Not Serious              | NA <sup>1</sup> | Not Serious | Unclear <sup>2</sup> | 0.50 (0.13-1.94)  | <b>High</b>     |
| PER 300 vs PLA      | 2 | Not Serious              | Not Serious     | Not Serious | Unclear <sup>2</sup> | 1.31 (0.60-2.82)  | <b>High</b>     |
| PER 600 vs PLA      | 2 | Not Serious              | Not Serious     | Not Serious | Unclear <sup>2</sup> | 1.08 (0.49-2.37)  | <b>High</b>     |
| ZAN 10 vs PLA       | 3 | Not Serious              | Not Serious     | Not Serious | Unclear <sup>2</sup> | 0.55 (0.26-1.17)  | <b>High</b>     |
| <b>Vomiting</b>     |   |                          |                 |             |                      |                   |                 |
| BAL 40/80 vs OSE 75 | 1 | Not Serious              | NA <sup>1</sup> | Not Serious | Unclear <sup>2</sup> | 0.70 (0.22-2.28)  | <b>High</b>     |
| BAL 40/80 vs PLA    | 1 | Not Serious              | NA <sup>1</sup> | Not Serious | Unclear <sup>2</sup> | 1.27 (0.25-6.49)  | <b>High</b>     |
| OSE 150 vs OSE 75   | 2 | Not Serious              | Not Serious     | Not Serious | Unclear <sup>2</sup> | 1.05 (0.73-1.50)  | <b>High</b>     |
| OSE 150 vs PLA      | 2 | Not Serious              | Not Serious     | Not Serious | Unclear <sup>2</sup> | 3.70 (2.08-6.57)  | <b>High</b>     |
| OSE 75 vs PLA       | 7 | Not Serious              | Not Serious     | Not Serious | Unclear <sup>2</sup> | 1.88 (1.47-2.41)  | <b>High</b>     |
| PER 300 vs PLA      | 1 | Not Serious              | NA <sup>1</sup> | Not Serious | Unclear <sup>2</sup> | 0.61 (0.22-1.71)  | <b>High</b>     |
| ZAN 10 vs PLA       | 1 | Not Serious              | NA <sup>1</sup> | Not Serious | Unclear <sup>2</sup> | 1.10 (0.39-3.09)  | <b>High</b>     |

1. Unable to assess because there are <2 studies available with non-zero events in both arms.
2. As per protocol, the funnel plot or Egger's test was not performed because of insufficient information (<10 studies).
3. Studies failed to blind patients and investigators that might lead to performance bias.
4. Studies had inadequate randomization and assignments that might be anticipated.
5. Studies had incomplete outcome data given that drop-outs and people lost to follow-ups could have clinically relevant impact on the intervention effect estimates.



**eTable 6.** Certainty of Network Evidence Assessment

| Comparison                                    | Direct Evidence  |                       | Indirect Evidence |                                | Network Meta-Analysis |                              |
|-----------------------------------------------|------------------|-----------------------|-------------------|--------------------------------|-----------------------|------------------------------|
|                                               | HR (95% CI)      | Certainty of Evidence | HR (95% CI)       | Certainty of Evidence          | HR (95% CI)           | Certainty of Evidence        |
| <b>TTAS (ITTI analysis) (n = 15)</b>          |                  |                       |                   |                                |                       |                              |
| BAL 40/80 vs OSE 150                          | -                | -                     | 1.06 (0.91-1.24)  | <b>Moderate</b> <sup>4</sup>   | 1.06 (0.91-1.24)      | <b>Low</b> <sup>2</sup>      |
| BAL 40/80 vs OSE 75                           | 1.05 (0.96-1.14) | Moderate              | 1.20 (0.97-1.48)  | <b>Moderate</b> <sup>4</sup>   | 1.07 (0.98-1.16)      | <b>Low</b> <sup>2</sup>      |
| BAL 40/80 vs PER 300                          | -                | -                     | 1.06 (0.86-1.30)  | <b>Moderate</b> <sup>4</sup>   | 1.06 (0.86-1.30)      | <b>Low</b> <sup>2</sup>      |
| BAL 40/80 vs PER 600                          | -                | -                     | 1.15 (0.88-1.50)  | <b>Low</b> <sup>4,5</sup>      | 1.15 (0.88-1.50)      | <b>Very low</b> <sup>2</sup> |
| BAL 40/80 vs PLA                              | 0.81 (0.74-0.89) | Moderate              | 0.71 (0.58-0.88)  | <b>Moderate</b> <sup>4</sup>   | 0.79 (0.73-0.86)      | <b>Moderate</b>              |
| BAL 40/80 vs ZAN 10                           | -                | -                     | 1.19 (1.01-1.40)  | <b>Low</b> <sup>4,5</sup>      | 1.19 (1.01-1.40)      | <b>Low</b>                   |
| OSE 150 vs OSE 75                             | 1.02 (0.86-1.20) | High                  | 0.96 (0.73-1.27)  | Not needed <sup>1</sup>        | 1.00 (0.87-1.16)      | <b>Moderate</b> <sup>2</sup> |
| OSE 150 vs PER 300                            | -                | -                     | 0.99 (0.78-1.26)  | High <sup>3</sup>              | 0.99 (0.78-1.26)      | <b>Moderate</b> <sup>2</sup> |
| OSE 150 vs PER 600                            | -                | -                     | 1.08 (0.81-1.44)  | <b>Moderate</b> <sup>3,5</sup> | 1.08 (0.81-1.44)      | <b>Low</b> <sup>2</sup>      |
| OSE 150 vs PLA                                | 0.74 (0.63-0.86) | High                  | 0.78 (0.58-1.06)  | Not needed <sup>1</sup>        | 0.75 (0.65-0.86)      | <b>High</b>                  |
| OSE 150 vs ZAN 10                             | -                | -                     | 1.12 (0.91-1.36)  | <b>Moderate</b> <sup>3,5</sup> | 1.12 (0.91-1.36)      | <b>Low</b> <sup>2</sup>      |
| OSE 75 vs PER 300                             | -                | -                     | 0.99 (0.81-1.21)  | <b>Moderate</b> <sup>4</sup>   | 0.99 (0.81-1.21)      | <b>Low</b> <sup>2</sup>      |
| OSE 75 vs PER 600                             | -                | -                     | 1.08 (0.83-1.40)  | <b>Low</b> <sup>4,5</sup>      | 1.08 (0.83-1.40)      | <b>Very low</b> <sup>2</sup> |
| OSE 75 vs PLA                                 | 0.74 (0.69-0.79) | Moderate              | 0.99 (0.62-1.56)  | <b>Moderate</b> <sup>4</sup>   | 0.74 (0.70-0.79)      | <b>Moderate</b>              |
| OSE 75 vs ZAN 10                              | -                | -                     | 1.11 (0.95-1.30)  | <b>Moderate</b> <sup>4</sup>   | 1.11 (0.95-1.30)      | <b>Low</b> <sup>2</sup>      |
| PER 300 vs PER 600                            | 1.01 (0.77-1.33) | High                  | 1.61 (0.87-2.99)  | Not needed <sup>1</sup>        | 1.09 (0.85-1.40)      | <b>Moderate</b> <sup>2</sup> |
| PER 300 vs PLA                                | 0.75 (0.62-0.91) | High                  | -                 | -                              | 0.75 (0.62-0.91)      | <b>High</b>                  |
| PER 300 vs ZAN 10                             | -                | -                     | 1.12 (0.88-1.43)  | <b>High</b> <sup>3</sup>       | 1.12 (0.88-1.43)      | <b>Moderate</b> <sup>2</sup> |
| PER 600 vs PLA                                | 0.64 (0.48-0.84) | High                  | 1.02 (0.55-1.89)  | Not needed <sup>1</sup>        | 0.69 (0.54-0.88)      | <b>High</b>                  |
| PER 600 vs ZAN 10                             | -                | -                     | 1.03 (0.77-1.37)  | <b>Moderate</b> <sup>3,5</sup> | 1.03 (0.77-1.37)      | <b>Low</b> <sup>2</sup>      |
| PLA vs ZAN 10                                 | 1.50 (1.30-1.73) | High                  | -                 | -                              | 1.50 (1.30-1.73)      | <b>High</b>                  |
| <b>Complications (ITTI analysis) (n = 21)</b> |                  |                       |                   |                                |                       |                              |
| BAL 40/80 vs OSE 150                          | -                | -                     | 0.78 (0.41-1.46)  | <b>Moderate</b> <sup>4</sup>   | 0.78 (0.41-1.46)      | <b>Low</b> <sup>2</sup>      |
| BAL 40/80 vs OSE 75                           | 0.91 (0.53-1.57) | Moderate              | 0.63 (0.25-1.58)  | <b>Moderate</b> <sup>4</sup>   | 0.83 (0.52-1.32)      | <b>Low</b> <sup>2</sup>      |
| BAL 40/80 vs PER 300                          | -                | -                     | 0.75 (0.38-1.49)  | <b>Moderate</b> <sup>4</sup>   | 0.75 (0.38-1.49)      | <b>Low</b> <sup>2</sup>      |
| BAL 40/80 vs PER 600                          | -                | -                     | 0.77 (0.37-1.59)  | <b>Low</b> <sup>4,5</sup>      | 0.77 (0.37-1.59)      | <b>Very Low</b> <sup>2</sup> |
| BAL 40/80 vs PLA                              | 0.44 (0.27-0.72) | Moderate              | 1.17 (0.35-3.94)  | <b>Moderate</b> <sup>4</sup>   | 0.51 (0.32-0.80)      | <b>Moderate</b>              |
| BAL 40/80 vs ZAN 10                           | -                | -                     | 0.62 (0.39-0.99)  | <b>Moderate</b> <sup>4</sup>   | 0.62 (0.39-0.99)      | <b>Moderate</b>              |

|                                                |                  |          |                  |                         |                  |                       |
|------------------------------------------------|------------------|----------|------------------|-------------------------|------------------|-----------------------|
| OSE 150 vs OSE 75                              | 0.94 (0.56-1.58) | High     | 1.71 (0.64-4.55) | Not needed <sup>1</sup> | 1.07 (0.67-1.69) | Moderate <sup>2</sup> |
| OSE 150 vs PER 300                             | -                | -        | 0.97 (0.49-1.92) | High <sup>3</sup>       | 0.97 (0.49-1.92) | Moderate <sup>2</sup> |
| OSE 150 vs PER 600                             | -                | -        | 0.99 (0.48-2.04) | Moderate <sup>3,5</sup> | 0.99 (0.48-2.04) | Low <sup>2</sup>      |
| OSE 150 vs PLA                                 | 0.69 (0.42-1.12) | High     | 0.45 (0.13-1.53) | Not needed <sup>1</sup> | 0.65 (0.41-1.02) | Moderate <sup>2</sup> |
| OSE 150 vs ZAN 10                              | -                | -        | 0.80 (0.50-1.27) | High <sup>3</sup>       | 0.80 (0.50-1.27) | Moderate <sup>2</sup> |
| OSE 75 vs PER 300                              | -                | -        | 0.91 (0.52-1.57) | Moderate <sup>4</sup>   | 0.91 (0.52-1.57) | Low <sup>2</sup>      |
| OSE 75 vs PER 600                              | 1.62 (0.53-4.95) | Moderate | 0.75 (0.38-1.51) | Low <sup>4,5</sup>      | 0.93 (0.52-1.68) | Very Low <sup>2</sup> |
| OSE 75 vs PLA                                  | 0.61 (0.49-0.75) | Moderate | 0.74 (0.21-2.62) | Moderate <sup>4</sup>   | 0.61 (0.49-0.75) | Moderate              |
| OSE 75 vs ZAN 10                               | -                | -        | 0.75 (0.59-0.95) | Moderate <sup>4</sup>   | 0.75 (0.59-0.95) | Moderate              |
| PER 300 vs PER 600                             | 1.60 (0.38-6.66) | High     | 0.88 (0.38-2.03) | Not needed <sup>1</sup> | 1.03 (0.50-2.11) | Moderate <sup>2</sup> |
| PER 300 vs PLA                                 | 0.65 (0.38-1.11) | High     | 0.95 (0.15-6.00) | Not needed <sup>1</sup> | 0.67 (0.40-1.12) | Moderate <sup>2</sup> |
| PER 300 vs ZAN 10                              | -                | -        | 0.82 (0.49-1.39) | High <sup>3</sup>       | 0.82 (0.49-1.39) | Moderate <sup>2</sup> |
| PER 600 vs PLA                                 | 0.82 (0.41-1.64) | High     | 0.40 (0.15-1.10) | Not needed <sup>1</sup> | 0.65 (0.37-1.16) | Moderate <sup>2</sup> |
| PER 600 vs ZAN 10                              | -                | -        | 0.80 (0.45-1.43) | Moderate <sup>3</sup>   | 0.80 (0.45-1.43) | Low <sup>2</sup>      |
| ZAN 10 vs PLA                                  | 0.82 (0.72-0.92) | High     | -                | -                       | 0.82 (0.72-0.92) | High                  |
| <b>Any adverse event (As-treated) (n = 21)</b> |                  |          |                  |                         |                  |                       |
| BAL 40/80 vs OSE 150                           | -                | -        | 0.86 (0.53-1.42) | Low <sup>4,5</sup>      | 0.86 (0.53-1.42) | Very Low <sup>2</sup> |
| BAL 40/80 vs OSE 75                            | 0.87 (0.76-1.00) | Moderate | 0.90 (0.64-1.27) | Moderate <sup>4</sup>   | 0.87 (0.77-0.99) | Moderate              |
| BAL 40/80 vs PER 300                           | -                | -        | 0.89 (0.77-1.04) | Moderate <sup>4</sup>   | 0.89 (0.77-1.04) | Low <sup>2</sup>      |
| BAL 40/80 vs PER 600                           | -                | -        | 0.87 (0.75-1.01) | Low <sup>4,5</sup>      | 0.87 (0.75-1.01) | Very Low <sup>2</sup> |
| BAL 40/80 vs PLA                               | 0.85 (0.74-0.97) | Moderate | 0.81 (0.57-1.17) | Moderate <sup>4</sup>   | 0.84 (0.74-0.96) | Moderate              |
| BAL 40/80 vs ZAN 10                            | -                | -        | 0.96 (0.80-1.14) | Moderate <sup>4</sup>   | 0.96 (0.80-1.14) | Low <sup>2</sup>      |
| OSE 150 vs OSE 75                              | 1.01 (0.62-1.64) | High     | -                | -                       | 1.01 (0.62-1.64) | Moderate <sup>2</sup> |
| OSE 150 vs PER 300                             | -                | -        | 1.03 (0.63-1.70) | Low <sup>4,5</sup>      | 1.03 (0.63-1.70) | Very Low <sup>2</sup> |
| OSE 150 vs PER 600                             | -                | -        | 1.01 (0.61-1.65) | Low <sup>4,5</sup>      | 1.01 (0.61-1.65) | Very Low <sup>2</sup> |
| OSE 150 vs PLA                                 | -                | -        | 0.97 (0.60-1.59) | Low <sup>4,5</sup>      | 0.97 (0.60-1.59) | Very Low <sup>2</sup> |
| OSE 150 vs ZAN 10                              | -                | -        | 1.11 (0.67-1.84) | Low <sup>4,5</sup>      | 1.11 (0.67-1.84) | Very Low <sup>2</sup> |
| OSE 75 vs PER 300                              | -                | -        | 1.02 (0.89-1.16) | Moderate <sup>4</sup>   | 1.02 (0.89-1.16) | Low <sup>2</sup>      |
| OSE 75 vs PER 600                              | 1.61 (0.83-3.12) | Moderate | 0.98 (0.86-1.11) | Low <sup>4,5</sup>      | 0.99 (0.88-1.13) | Low                   |
| OSE 75 vs PLA                                  | 0.95 (0.86-1.05) | Moderate | 1.52 (0.83-2.78) | Moderate <sup>4</sup>   | 0.96 (0.87-1.06) | Low <sup>2</sup>      |
| OSE 75 vs ZAN 10                               | -                | -        | 1.09 (0.93-1.28) | Moderate <sup>4</sup>   | 1.09 (0.93-1.28) | Low <sup>2</sup>      |
| PER 300 vs PER 600                             | 0.96 (0.88-1.06) | High     | 1.12 (0.80-1.57) | Not needed <sup>1</sup> | 0.98 (0.89-1.07) | Moderate <sup>2</sup> |
| PER 300 vs PLA                                 | 0.96 (0.88-1.05) | High     | 0.72 (0.48-1.07) | Not needed <sup>1</sup> | 0.95 (0.87-1.03) | Moderate <sup>2</sup> |

|                                      |                   |          |                   |                                |                  |                              |
|--------------------------------------|-------------------|----------|-------------------|--------------------------------|------------------|------------------------------|
| PER 300 vs ZAN 10                    | -                 | -        | 1.07 (0.92-1.25)  | <b>High</b> <sup>3</sup>       | 1.07 (0.92-1.25) | <b>Moderate</b> <sup>2</sup> |
| PER 600 vs PLA                       | 0.97 (0.90-1.06)  | High     | 0.88 (0.59-1.30)  | Not needed <sup>1</sup>        | 0.97 (0.90-1.05) | <b>Moderate</b> <sup>2</sup> |
| PER 600 vs ZAN 10                    | -                 | -        | 1.10 (0.95-1.28)  | <b>Moderate</b> <sup>3,5</sup> | 1.10 (0.95-1.28) | <b>Low</b> <sup>2</sup>      |
| ZAN 10 vs PLA                        | 0.88 (0.78-1.00)  | High     | -                 | -                              | 0.88 (0.78-1.00) | <b>Moderate</b> <sup>2</sup> |
| <b>Nausea (As-treated) (n = 15)</b>  |                   |          |                   |                                |                  |                              |
| BAL 40/80 vs OSE 150                 | -                 | -        | 0.40 (0.24-0.67)  | <b>Moderate</b> <sup>4</sup>   | 0.40 (0.24-0.67) | <b>Moderate</b>              |
| BAL 40/80 vs OSE 75                  | 0.53 (0.33-0.83)  | Moderate | 0.12 (0.03-0.55)  | <b>Moderate</b> <sup>4</sup>   | 0.47 (0.30-0.72) | <b>Moderate</b>              |
| BAL 40/80 vs PER 300                 | -                 | -        | 0.83 (0.36-1.95)  | <b>Moderate</b> <sup>4</sup>   | 0.83 (0.36-1.95) | <b>Low</b> <sup>2</sup>      |
| BAL 40/80 vs PER 600                 | -                 | -        | 0.74 (0.32-1.70)  | <b>Low</b> <sup>4,5</sup>      | 0.74 (0.32-1.70) | <b>Very Low</b> <sup>2</sup> |
| BAL 40/80 vs PLA                     | 0.74 (0.44-1.22)  | Moderate | 1.57 (0.56-4.42)  | <b>Moderate</b> <sup>4</sup>   | 0.85 (0.54-1.34) | <b>Low</b> <sup>2</sup>      |
| BAL 40/80 vs ZAN 10                  | -                 | -        | 1.55 (0.64-3.77)  | <b>Moderate</b> <sup>4</sup>   | 1.55 (0.64-3.77) | <b>Low</b> <sup>2</sup>      |
| OSE 150 vs OSE 75                    | 1.07 (0.78-1.46)  | High     | 3.14 (1.10-8.97)  | Not needed <sup>1</sup>        | 1.17 (0.86-1.58) | <b>Moderate</b> <sup>2</sup> |
| OSE 150 vs PER 300                   | -                 | -        | 2.08 (0.93-4.64)  | <b>High</b> <sup>3</sup>       | 2.08 (0.93-4.64) | <b>Moderate</b> <sup>2</sup> |
| OSE 150 vs PER 600                   | -                 | -        | 1.84 (0.84-4.04)  | <b>Moderate</b> <sup>3,5</sup> | 1.84 (0.84-4.04) | <b>Low</b> <sup>2</sup>      |
| OSE 150 vs PLA                       | 2.78 (1.78-4.34)  | High     | 1.30 (0.71-2.38)  | Not needed <sup>1</sup>        | 2.13 (1.49-3.04) | <b>High</b>                  |
| OSE 150 vs ZAN 10                    | -                 | -        | 3.88 (1.68-8.98)  | <b>High</b> <sup>3</sup>       | 3.88 (1.68-8.98) | <b>High</b>                  |
| OSE 75 vs PER 300                    | -                 | -        | 1.78 (0.83-3.84)  | <b>Moderate</b> <sup>4</sup>   | 1.78 (0.83-3.84) | <b>Low</b> <sup>2</sup>      |
| OSE 75 vs PER 600                    | 3.00 (0.13-71.76) | Moderate | 1.52 (0.70-3.29)  | <b>Low</b> <sup>4,5</sup>      | 1.58 (0.75-3.35) | <b>Very Low</b> <sup>2</sup> |
| OSE 75 vs PLA                        | 1.81 (1.37-2.39)  | Moderate | 3.07 (0.29-32.70) | <b>Moderate</b> <sup>4</sup>   | 1.82 (1.38-2.41) | <b>Moderate</b>              |
| OSE 75 vs ZAN 10                     | -                 | -        | 3.33 (1.48-7.46)  | <b>Low</b> <sup>4,5</sup>      | 3.33 (1.48-7.46) | <b>Low</b>                   |
| PER 300 vs PER 600                   | 0.50 (0.13-1.94)  | High     | 1.34 (0.42-4.24)  | <b>Moderate</b> <sup>3,5</sup> | 0.89 (0.37-2.13) | <b>Low</b> <sup>2</sup>      |
| PER 300 vs PLA                       | 1.31 (0.60-2.82)  | High     | 0.21 (0.03-1.48)  | Not needed <sup>1</sup>        | 1.02 (0.50-2.10) | <b>Moderate</b> <sup>2</sup> |
| PER 300 vs ZAN 10                    | -                 | -        | 1.87 (0.66-5.30)  | <b>High</b> <sup>3</sup>       | 1.87 (0.66-5.30) | <b>Moderate</b> <sup>2</sup> |
| PER 600 vs PLA                       | 1.08 (0.49-2.37)  | High     | 1.50 (0.31-7.22)  | Not needed <sup>1</sup>        | 1.15 (0.57-2.33) | <b>Moderate</b> <sup>2</sup> |
| PER 600 vs ZAN 10                    | -                 | -        | 2.10 (0.75-5.92)  | <b>Moderate</b> <sup>5</sup>   | 2.10 (0.75-5.92) | <b>Low</b> <sup>2</sup>      |
| ZAN 10 vs PLA                        | 0.55 (0.26-1.17)  | High     | -                 | -                              | 0.55 (0.26-1.17) | <b>Moderate</b> <sup>2</sup> |
| <b>Vomiting (As-treated) (n = 9)</b> |                   |          |                   |                                |                  |                              |
| BAL 40/80 vs OSE 150                 | -                 | -        | 0.58 (0.18-1.87)  | <b>High</b> <sup>3</sup>       | 0.58 (0.18-1.87) | <b>Moderate</b> <sup>2</sup> |
| BAL 40/80 vs OSE 75                  | 0.70 (0.22-2.28)  | High     | 0.64 (0.02-18.33) | Not needed <sup>1</sup>        | 0.69 (0.23-2.11) | <b>Moderate</b> <sup>2</sup> |
| BAL 40/80 vs PER 300                 | -                 | -        | 2.15 (0.47-9.95)  | <b>High</b> <sup>3</sup>       | 2.15 (0.47-9.95) | <b>Moderate</b> <sup>2</sup> |
| BAL 40/80 vs PLA                     | 1.27 (0.25-6.49)  | High     | 1.34 (0.28-6.37)  | <b>High</b> <sup>3</sup>       | 1.31 (0.42-4.03) | <b>Moderate</b> <sup>2</sup> |
| BAL 40/80 vs ZAN 10                  | -                 | -        | 1.18 (0.26-5.46)  | <b>High</b> <sup>3</sup>       | 1.18 (0.26-5.46) | <b>Moderate</b> <sup>2</sup> |

|                    |                  |      |                   |                          |                   |                              |
|--------------------|------------------|------|-------------------|--------------------------|-------------------|------------------------------|
| OSE 150 vs OSE 75  | 1.05 (0.73-1.50) | High | 4.91 (1.48-16.30) | <b>High</b> <sup>3</sup> | 1.19 (0.84-1.68)  | <b>Moderate</b> <sup>2</sup> |
| OSE 150 vs PER 300 | -                | -    | 3.69 (1.22-11.17) | <b>High</b> <sup>3</sup> | 3.69 (1.22-11.17) | <b>High</b>                  |
| OSE 150 vs PLA     | 3.70 (2.08-6.57) | High | 1.43 (0.83-2.46)  | <b>High</b> <sup>3</sup> | 2.24 (1.51-3.32)  | <b>Moderate</b> <sup>6</sup> |
| OSE 150 vs ZAN 10  | -                | -    | 2.03 (0.67-6.12)  | <b>High</b> <sup>3</sup> | 2.03 (0.67-6.12)  | <b>Moderate</b> <sup>2</sup> |
| OSE 75 vs PER 300  | -                | -    | 3.10 (1.07-8.99)  | <b>High</b> <sup>3</sup> | 3.10 (1.07-8.99)  | <b>Moderate</b> <sup>2</sup> |
| OSE 75 vs PLA      | 1.88 (1.47-2.41) | High | -                 | -                        | 1.88 (1.47-2.41)  | <b>High</b>                  |
| OSE 75 vs ZAN 10   | -                | -    | 1.71 (0.59-4.93)  | <b>High</b> <sup>3</sup> | 1.71 (0.59-4.93)  | <b>Moderate</b> <sup>2</sup> |
| PER 300 vs PLA     | 0.61 (0.22-1.71) | High | -                 | -                        | 0.61 (0.22-1.71)  | <b>Moderate</b> <sup>2</sup> |
| PER 300 vs ZAN 10  | -                | -    | 0.55 (0.13-2.37)  | <b>High</b> <sup>3</sup> | 0.55 (0.13-2.37)  | <b>Moderate</b> <sup>2</sup> |
| ZAN 10 vs PLA      | 1.10 (0.39-3.09) | High | -                 | -                        | 1.10 (0.39-3.09)  | <b>Moderate</b> <sup>2</sup> |

1. There is no need to rate the indirect evidence since the certainty of the direct evidence is high and the contribution of the direct evidence to the network estimate is much greater than that of the indirect evidence.
2. Imprecise (wide 95% CI).
3. The confidence ratings for both direct comparisons are high.
4. The lower confidence rating of the two direct comparisons is moderate.
5. Probable intransitivity due to different severity of illness (outpatients or hospitalized patients).
6. Incoherence between direct and indirect evidence (dominant estimate not similar to network estimate).
